# Supplementary material for: Molecular Genetics of Abnormal Redox Homeostasis in Type 2 Diabetes Mellitus
Source: MDPI journal article supplement (doi:10.3390/ijms24054738), 2023-03-01
Supplement: s1 [file s1]

**Supplementary Table S2.** eQTL-analysis of SNPs associated with T2D

[illegible]

|      |            |                    |                                    |       |   |   |                                                                                                                           |   |             |         |                                   |                   |             |                                                                                                 |            |   |                   |
|------|------------|--------------------|------------------------------------|-------|---|---|---------------------------------------------------------------------------------------------------------------------------|---|-------------|---------|-----------------------------------|-------------------|-------------|-------------------------------------------------------------------------------------------------|------------|---|-------------------|
| GGT1 | rs5751909  | <u>22:24617379</u> | intron variant                     | G/A   | G | A | GGT1(↓)<br>FAM211B(↓)<br>BCRP3(↓)<br>SGSM1(↓)                                                                             | - | GGT1(↑)     | -       | -                                 | -                 | -           | BCRP3(↓)                                                                                        | -          | - | BCRP3(Brain)      |
| GGT1 | rs5760489  | <u>22:24594679</u> | intron variant                     | A/G   | G | G | GGT1(↓)<br>FAM211B(↓)<br>BCRP3(↓)                                                                                         | - | GGT1(↑)     | -       | -                                 | -                 | -           | LRRC75B(↓)                                                                                      | -          | - | BCRP3(Brain)      |
| GGT1 | rs5760492  | <u>22:24599235</u> | non coding transcript exon variant | G/A   | G | A | GGT1(↓)<br>FAM211B(↓)<br>BCRP3(↓)<br>SGSM1(↓)                                                                             | - | GGT1(↑)     | GGT1(↑) | -                                 | -                 | GGT1(↓)     | GGT1(↓)<br>LRRC75B(↓)                                                                           | -          | - | BCRP3(Brain)      |
| GGT5 | rs2275984  | <u>22:24226680</u> | missense variant                   | T/C?  | C | C | GGT5(↓)<br>GGT1(↓)<br>GSTT1(↓)<br>UPB1(↓)<br>AP000355,2(↓)<br>DDT(↓)<br>SUSD2(↓)<br>SPECC1L(↓)<br>ADORA2A(↑)              | - | POM121LP(↓) | -       | POM121L9I(↓)                      | POM121L9I(↓)      | POM121LP(↓) | POM121L9I(↓)<br>SPECC1L(↑)                                                                      | -          | - | -                 |
| GGT5 | rs8140505  | <u>22:24220908</u> | intron variant                     | A/G   | G | G | GSTT1(↑)<br>SUSD2(↑)<br>DDT(↑)<br>AP000351,10(↓)<br>AP000355,2(↓)<br>UPB1(↓)                                              | - | -           | -       | POM121L9I(↓)                      | AP000351,4(↓)     | -           | POM121L9I(↓)                                                                                    | -          | - | -                 |
| GGT5 | rs4822473  | <u>22:24235823</u> | intron variant                     | A/G   | A | G | GSTT1(↑)<br>SUSD2(↑)<br>AP000351,10(↓)<br>DDT(↑)<br>SPECC1L(↑)<br>AP000350,6(↑)<br>ADORA2A(↑)<br>UPB1(↓)<br>AP000355,2(↓) | - | -           | -       | POM121L9I(↓)                      | GGT5(↑)           | -           | POM121L9I(↓)                                                                                    | -          | - | -                 |
| GGT6 | rs11657054 | <u>17:4559728</u>  | missense variant                   | G/A   | G | G | CXCL16(↑)<br>MYBBP1A(↓)                                                                                                   | - | GGT6(↑)     | GGT6(↑) | MYBBP1A(↓)                        | -                 | -           | MYBBP1A(↓)                                                                                      | MYBBP1A(↓) | - | -                 |
| GGT6 | rs2100986  | <u>17:4562207</u>  | regulatory region variant          | C/G/T | T | C | CXCL16(↑)<br>ALOX15(↑)<br>PLD2(↓)<br>MYBBP1A(↓)                                                                           | - | GGT6(↑)     | -       | MYBBP1A(↓)                        | -                 | -           | MYBBP1A(↓)                                                                                      | MYBBP1A(↓) | - | -                 |
| GGT7 | rs11546155 | <u>20:34863345</u> | synonymous variant                 | G/A   | G | A | TRPC4AP(↑)<br>NCOA6(↑)<br>EDEM2(↑)<br>EIF6(↑)<br>GSS(↑)<br>PROCR(↑)                                                       | - | -           | -       | GGT7(↓)<br>NCOA6(↑)<br>MAP1LC3(↓) | PIGU(↑)<br>GSS(↑) | NCOA6(↑)    | NCOA6(↑)<br>TP53INP2(↓)<br>MAP1LC3(↓)<br>NCOA6(↓)<br>MAP1LC3(↓)<br>FDX1P1(↓)<br>GGT7(↓)<br>PIGU | -          | - | TRPC4AP (adipose) |

|       |           |                    |                      |       |   |    |                                                                                                                                                           |   |                                                                          |                                                                        |                                                                                                                                  |                                                                                                                         |                                                                                                         |   |   |   |                                                                                                                                    |                         |
|-------|-----------|--------------------|----------------------|-------|---|----|-----------------------------------------------------------------------------------------------------------------------------------------------------------|---|--------------------------------------------------------------------------|------------------------------------------------------------------------|----------------------------------------------------------------------------------------------------------------------------------|-------------------------------------------------------------------------------------------------------------------------|---------------------------------------------------------------------------------------------------------|---|---|---|------------------------------------------------------------------------------------------------------------------------------------|-------------------------|
|       |           |                    |                      |       |   |    | MAP1LC3A(↓;<br>TP53INP2(↓;<br>ITCH(↓)<br>RP4-<br>614O4,12(↓)                                                                                              |   |                                                                          |                                                                        |                                                                                                                                  |                                                                                                                         |                                                                                                         |   |   |   |                                                                                                                                    |                         |
| GGT7  | rs6119534 | <u>20:34853454</u> | intron<br>variant    | C/G/T | C | T  | MAP1LC3A(↑<br>ITCH(↑)<br>EIF2S2(↑)<br>MYH7B(↑)<br>EDEM2(↓)<br>GGT7(↓)<br>RP4-<br>614O4,12(↓)<br>UQCC(↓)<br>PROCR(↓)<br>RP5-<br>1125A11,1(↓;<br>TRPC4AP(↓) | - | EDEM2(↑)<br>PROCR(↑)<br>MYH7B(↑)                                         | MAP1LC3A(↑)<br>MAP1LC3A(↑)                                             | MAP1LC3A(↑)<br>GGT7(↑)<br>ACSS2(↑)<br>EDEM2(↓)<br>MYH7B(↑)<br>GSS(↑)<br>A(↑)<br>1125A11,7(↑)<br>PROCR(↓)<br>ACSS2(↑)<br>EDEM2(↓) | MAP1LC3A(↑)<br>ACSS2(↑)<br>MYH7B(↑)<br>FDX1P1(↑)<br>EDEM2(↓)<br>RP5-<br>EDEM2(↓)<br>PROCR(↓)<br>TP53INP2(↑)<br>NCOA6(↑) |                                                                                                         |   |   |   | TRPC4AP (arter<br>adipose)<br>GSS (skeletal,<br>adipose)<br>MAP1LC3A(Br<br>n)<br>GGT7 (skeletal                                    |                         |
| GGCT  | rs6462210 | <u>7:30499979</u>  | intron<br>variant    | C/T   | T | T  | AC005154,8(↓<br>AC005154,6(↓                                                                                                                              | - | AC005154<br>(↓)                                                          | -                                                                      | -                                                                                                                                | AC005154,6<br>)                                                                                                         | AC005154,6<br>)                                                                                         | - | - | - | -                                                                                                                                  | AC005154,6<br>(adipose) |
| GGCT  | rs28679   | <u>7:30502181</u>  | intron<br>variant    | A/G   | A | A  | GGCT(↑)<br>AC005154,6(↑<br>AC005154,8(↑<br>CRHR2(↑)<br>GARS(↑)<br>AC005154,5(↓                                                                            | - | GGCT(↓<br>AC005154<br>(↓)<br>AC005154<br>(↓)<br>AC005154<br>(↓)          | AC005154<br>(↓)<br>AC005154,7<br>)                                     | GGCT(↓)<br>AC005154,6<br>(↓)<br>AC005154,7<br>)                                                                                  | GGCT(↓)<br>AC005154<br>(↓)<br>AC005154,8<br>(↓)<br>RP4-<br>AC005154,8<br>(↓)<br>777O23,1(↓<br>AC005154,7<br>)           | GGCT(↓)<br>AC005154,6<br>(↓)<br>AC005154,7<br>(↓)<br>AC005154,8<br>(↓)<br>777O23,1(↓<br>AC005154,7<br>) |   |   |   | AC005154,6<br>(skeletal, adipos<br>artery, brain,<br>liver, pancreas<br>nerve)<br>GGCT (artery,<br>brain, pancreas<br>GGCT (nerve) |                         |
| GSTP1 | rs1695    | <u>11:67585218</u> | missens<br>e variant | A/G   |   | G  | -                                                                                                                                                         | - | DOC2GP(↓<br>NUDT8(↑)<br>CDK2AP(↑)<br>RPS6KB2(↓<br>NDUFV1(↑<br>RPS6KB2(↓) | NUDT8(↑)<br>GSTP1(↓)<br>RPS6KB2(↓)<br>NDUFV1(↑<br>DOC2GP(↓<br>NUDT8(↑) | GSTP1(↓)<br>RPS6KB2(↓)<br>AIP(↓)<br>DOC2GP(↓<br>NUDT8(↑)<br>PC(↑)                                                                | GSTP1(↓)<br>DOC2GP(↓)<br>NDUFV1(↑<br>DOC2GP(↓)<br>NUDT8(↑)                                                              | GSTP1(↓)<br>DOC2GP(↓)<br>NDUFV1(↑<br>RPS6KB2(↓)<br>DOC2GP(↑<br>NUDT8(↑)<br>NDUFV1(↑                     |   |   |   | DOC2GP (arter<br>NDUFV1<br>(skeletal,pancre<br>RPS6KB2<br>(skeletal, artery<br>adipose)<br>NDUFV1 (Brain<br>artery, adipose)       |                         |
| GSTP1 | rs1138272 | <u>11:67586108</u> | missens<br>e variant | C/T   |   | T) | DOC2GP(↑)<br>RPS6KB2(↑)<br>ANKRD13D(↑<br>C11orf80(↑)<br>LRFN4(↑)<br>CCS(↓)<br>CLCF1(↓)<br>SSH3(↓)<br>POLD4(↓)<br>AIP(↓)                                   | - | DOC2GP(↓<br>ANKRD1<br>D(↑)                                               | ANKRD13E<br>(↑)<br>DOC2GP(↓<br>NDUFV1(↓<br>RPS6KB2(↓                   | ANKRD13E<br>(↑)<br>DOC2GP(↓<br>RPS6KB2(↓                                                                                         | CLCF1(↓)<br>DOC2GP(↓)<br>RAD9A(↓)<br>NDUFV1(↑<br>ANKRD13E<br>(↑)<br>RPS6KB2(↓<br>ANKRD13E<br>(↑)                        |                                                                                                         |   |   | - |                                                                                                                                    |                         |

| CORO1B(↓) |            |                    |                     |       |   |   |                                                                               |   |          |          |          |                     |                     |                                 |                                |                      |                                                                                        |
|-----------|------------|--------------------|---------------------|-------|---|---|-------------------------------------------------------------------------------|---|----------|----------|----------|---------------------|---------------------|---------------------------------|--------------------------------|----------------------|----------------------------------------------------------------------------------------|
| RAC1      | rs10951982 | <u>7:6382925</u>   | intron variant      | G/A/T | G | A | DAGLB(↑)<br>FAM220A(↑)<br>ZDHHC4(↓)                                           | - | DAGLB(↓) | -        | DAGLB(↑) | RAC1(↓)<br>DAGLB(↑) | DAGLB(↓)            | DAGLB(↑)                        | -                              | DAGLB (↑)<br>RAC1(↑) | DAGLB (nerve artery, brain)<br>DAGLB (adipos pancreas, kidney liver,) RAC1 (artery)    |
| RAC1      | rs4724800  | <u>7:6370897</u>   | intergenic variant  | A/G   | A | G | DAGLB(↑)<br>FAM220A(↑)<br>CCZ1B(↑)<br>CCZ1(↓)                                 | - | DAGLB(↓) | -        | DAGLB(↑) | DAGLB(↑)            | DAGLB(↓)            | DAGLB(↑)                        | -                              | DAGLB(↑)             | DAGLB (adipos nerve, artery)<br>DAGLB (brain kidney, pancreas, skeletal) RAC1 (artery) |
| RAC1      | rs7784465  | <u>7:6378644</u>   | intron variant      | T/C   | T | C | RAC1(↑)<br>KDEL2(↑)<br>FAM220A(↑)<br>DAGLB(↓)<br>ZDHHC4(↓)                    | - | -        | -        | RAC1(↑)  | -                   | RAC1(↑)             | -                               | -                              | -                    | -                                                                                      |
| RAC1      | rs836478   | <u>7:6392059</u>   | intron variant      | C/T   | T | T | DAGLB(↑)<br>RAC1(↑)<br>FAM220A(↑)<br>GRID2IP(↑)<br>AC073343,11(↓)<br>CCZ1B(↓) | - | DAGLB(↓) | -        | DAGLB(↑) | -                   | DAGLB(↓)            | DAGLB(↑)                        | -                              | -                    | RAC1 (skeletal)<br>DAGLB (artery brain, skeletal)                                      |
| RAC1      | rs9374     | <u>7:6402740</u>   | 3 prime UTR variant | G/A?  | G | A | -                                                                             | - | DAGLB(↓) | DAGLB(↓) | DAGLB(↑) | RAC1(↓)<br>DAGLB(↑) | RAC1(↑)<br>DAGLB(↓) | DAGLB(↑)                        | -                              | DAGLB (↑)<br>RAC1(↑) | DAGLB (artery)<br>DAGLB (adipos brain, kidney, liver, skeletal, pancreas)              |
| RAC1      | rs10238136 | <u>7:6383715</u>   | intron variant      | A/T   | A | T | RAC1(↑)<br>KDEL2(↓)<br>DAGLB(↓)                                               | - | -        | -        | -        | -                   | -                   | -                               | -                              | -                    | -                                                                                      |
| RAC2      | rs2239774  | <u>22:37241613</u> | synonymous variant  | G/C/T | G | C | RAC2(↑)<br>RP1-151B14,9(↑)<br>SSTR3(↑)                                        | - | -        | -        | -        | -                   | -                   | -                               | -                              | -                    | -                                                                                      |
| CYBA      | rs9932581  | <u>16:88651945</u> | 3 prime UTR variant | C/T   | C | T | MVD(↑)<br>RNF166(↑)<br>SNAI3-AS1(↑)<br>GALNS(↓)<br>TRAPPC2L(↓)                | - | -        | -        | -        | -                   | MVD(↑)              | -                               | -                              | -                    | -                                                                                      |
| CYBA      | rs4673     | <u>16:88646828</u> | missense variant    | A/G/T | A | A | SNAI3-AS1(↑)<br>RNF166(↓)<br>SNAI3(↓)<br>MVD(↓)                               | - | -        | -        | -        | -                   | -                   | CYBA (G) (↓)<br>SNAI3-AS1(G)(↓) | CYBA (G)(↓)<br>SNAI3-AS1(G)(↓) | -                    | -                                                                                      |

[illegible]



|                |            |                     |                   |       |   |   |                          |   |   |   |   |         |   |            |            |   |   |
|----------------|------------|---------------------|-------------------|-------|---|---|--------------------------|---|---|---|---|---------|---|------------|------------|---|---|
| <i>GLIS3</i>   | rs10814916 | <u>9:4293150</u>    | intron<br>variant | A/C   | A | C | GLIS3(↓)                 | - | - | - | - | -       | - | -          | -          | - | - |
| <i>GYS2</i>    | rs10841855 | <u>12:21599174</u>  | intron<br>variant | G/T   | G | T | GOLT1B(↓)<br>C12orf39(↓) | - | - | - | - | -       | - | PYROXD1(↓) | PYROXD1(↓) | - | - |
| <i>GRK5</i>    | rs10886471 | <u>10:119389891</u> | intron<br>variant | C/T   | C | T | GRK5(↓)                  | - | - | - | - | -       | - | -          | -          | - | - |
| <i>PPARG</i>   | rs11709077 | <u>3:12295008</u>   | intron<br>variant | G/A   | G | A | TSEN2(↑)<br>SYN2(↓)      | - | - | - | - | SYN2(↑) | - | -          | -          | - | - |
| <i>IGF2BP2</i> | rs11927381 | <u>3:185790803</u>  | intron<br>variant | T/C   | C | C | LIPH(↑)<br>EHHADH(↓)     | - | - | - | - | -       | - | -          | -          | - | - |
| <i>KCNQ1</i>   | rs2237896  | <u>11:2837210</u>   | intron<br>variant | G/A/T | G | A | CDKN1C(↓)<br>NAP1L4(↓)   | - | - | - | - | -       | - | TSPAN32(↓) | -          | - | - |
| <i>DAAM1</i>   | rs35209784 | <u>14:59285112</u>  | intron<br>variant | C/T   | C | T | L3HYPDH(↑)               | - | - | - | - | -       | - | DAAM1(↑)   | -          | - | - |
| <i>HNF1B</i>   | rs4430796  | <u>17:37738049</u>  | intron<br>variant | A/G   | G | - | -                        | - | - | - | - | -       | - | -          | -          | - | - |
| <i>CDKAL1</i>  | rs4712524  | <u>6:20657634</u>   | intron<br>variant | A/G   | A | G | CDKAL1(↑)                | - | - | - | - | -       | - | -          | -          | - | - |
| <i>CDKAL1</i>  | rs6931514  | <u>6:20703721</u>   | intron<br>variant | A/G   | A | G | CDKAL1(↑)                | - | - | - | - | -       | - | -          | -          | - | - |
| <i>TCF7L2</i>  | rs7903146  | <u>10:112998590</u> | intron<br>variant | C/G/T | T | T | -                        | - | - | - | - | -       | - | -          | TCF7L2(↓)  | - | - |
