# Supplementary material for: Molecular Genetics of Abnormal Redox Homeostasis in Type 2 Diabetes Mellitus
Source: MDPI journal article supplement (doi:10.3390/ijms24054738), 2023-03-01
Supplement: s1 [file s1]

**Suppl. Table S1.** Biological functions and tissue-specific expression of genes encoding enzymes for redox homeostasis

| Biological functions and tissue-specific gene expression of antioxidant enzymes                  |                                                                |                                                                                                                                                                                                                                                                                            |                                                                                                                                                                                                                                                                                                                                                    |                                     |                 |                |       |             |
|--------------------------------------------------------------------------------------------------|----------------------------------------------------------------|--------------------------------------------------------------------------------------------------------------------------------------------------------------------------------------------------------------------------------------------------------------------------------------------|----------------------------------------------------------------------------------------------------------------------------------------------------------------------------------------------------------------------------------------------------------------------------------------------------------------------------------------------------|-------------------------------------|-----------------|----------------|-------|-------------|
| Approved gene symbol <sup>1</sup><br>(Gene ID) <sup>2</sup><br>Chromosomal location <sup>2</sup> | Approved gene name <sup>1</sup><br>(protein name) <sup>3</sup> | Enzyme/protein function <sup>3</sup>                                                                                                                                                                                                                                                       | Basic function <sup>4</sup>                                                                                                                                                                                                                                                                                                                        | Tissue gene expression <sup>5</sup> |                 |                |       |             |
|                                                                                                  |                                                                |                                                                                                                                                                                                                                                                                            |                                                                                                                                                                                                                                                                                                                                                    | Pancreas                            | Skeletal muscle | Adipose tissue | Liver | Whole blood |
| <i>GSTM1</i><br>(2944)<br>1p13.3                                                                 | glutathione S-transferase mu 1                                 | Conjugation of reduced glutathione to a wide number of exogenous and endogenous hydrophobic electrophiles. Involved in the formation of glutathione conjugates of both prostaglandin A2 (PGA2) and prostaglandin J2 (PGJ2). Participates in the formation of novel hepoxilin regioisomers. | <ul style="list-style-type: none"><li>conjugating reduced glutathione to a wide number of exogenous and endogenous hydrophobic electrophiles</li><li>playing a role in telomere attrition and subsequent telomerase activity in the cancer cells</li><li>absence of GSTM1 activity can be compensated for by the overexpression of GSTM2</li></ul> | +                                   | +               | +              | +++   | +           |
| <i>GSTM2</i><br>(2946)<br>1p13.3                                                                 | glutathione S-transferase mu 2                                 | Conjugation of reduced glutathione to a wide number of exogenous and endogenous hydrophobic electrophiles. Participates in the formation of novel hepoxilin regioisomers.                                                                                                                  | <ul style="list-style-type: none"><li>conjugating reduced glutathione to a wide number of exogenous and endogenous hydrophobic electrophiles</li><li>GSTM2-2 is a novel luminal regulator of the RyR channels in the heart</li><li>absence of GSTM1 activity can be compensated for by the overexpression of GSTM2</li></ul>                       | +                                   | ++              | +              | +++   | +           |
| <i>GSTM3</i><br>(2947)<br>1p13.3                                                                 | glutathione S-transferase mu 3                                 | Conjugation of reduced glutathione to a wide number of exogenous and endogenous hydrophobic electrophiles. May govern uptake and detoxification of both endogenous compounds and xenobiotics at the testis and brain blood barriers.                                                       | <ul style="list-style-type: none"><li>establishment of blood/nerve barrier</li><li>conjugating reduced glutathione to a wide number of exogenous and endogenous hydrophobic electrophiles</li></ul>                                                                                                                                                | ++                                  | +               | ++             | ++    | -           |

|                                    |                                   |                                                                                                                                                                                                                                                                                                                                                                                                                                                                                                             |                                                                                                                                                                                                                                                                   |    |    |     |    |    |
|------------------------------------|-----------------------------------|-------------------------------------------------------------------------------------------------------------------------------------------------------------------------------------------------------------------------------------------------------------------------------------------------------------------------------------------------------------------------------------------------------------------------------------------------------------------------------------------------------------|-------------------------------------------------------------------------------------------------------------------------------------------------------------------------------------------------------------------------------------------------------------------|----|----|-----|----|----|
| <i>GSTM4</i><br>(2948)<br>1p13.3   | glutathione S-transferase mu 4    | <p>Conjugation of reduced glutathione to a wide number of exogenous and endogenous hydrophobic electrophiles. Catalyzes the conjugation of leukotriene A4 with reduced glutathione (GSH) to form leukotriene C4.</p> <p>Can also catalyzes the transfer of a glutathionyl group from glutathione (GSH) to 13(S),14(S)-epoxy-docosahexaenoic acid to form maresin conjugate in tissue regeneration 1 (MCTR1), a bioactive lipid mediator that possess potent anti-inflammatory and proresolving actions.</p> | <ul style="list-style-type: none"> <li>playing a role in proliferation and oncogenic transformation is likely specific to Ewing's sarcoma</li> </ul>                                                                                                              | ++ | ++ | ++  | ++ | ++ |
| <i>GSTM5</i><br>(2949)<br>1p13.3   | glutathione S-transferase mu 5    | <p>Conjugation of reduced glutathione to a wide number of exogenous and endogenous hydrophobic electrophiles.</p>                                                                                                                                                                                                                                                                                                                                                                                           | <ul style="list-style-type: none"> <li>glutathione-S-transferase</li> </ul>                                                                                                                                                                                       | ++ | ++ | +   | ++ | ++ |
| <i>GSTT1</i><br>(2952)<br>22q11.23 | glutathione S-transferase theta 1 | <p>Conjugation of reduced glutathione to a wide number of exogenous and endogenous hydrophobic electrophiles. Acts on 1,2-epoxy-3-(4-nitrophenoxy)propane, phenethylisothiocyanate 4-nitrobenzyl chloride and 4-nitrophenethyl bromide. Displays glutathione peroxidase activity with cumene hydroperoxide.</p>                                                                                                                                                                                             | <ul style="list-style-type: none"> <li>involved in tautomerization of d-dopachrome with decarboxylation to give 5,6-dihydroxyindole</li> <li>catalyzing the conjugation of reduced glutathione to a variety of electrophilic and hydrophobic compounds</li> </ul> | ++ | ++ | +++ | +  | +  |

---

|                                    |                                       |                                                                                                                                         |                                                                                                                                                                                                                                                                                                                                                                                |    |    |   |    |    |
|------------------------------------|---------------------------------------|-----------------------------------------------------------------------------------------------------------------------------------------|--------------------------------------------------------------------------------------------------------------------------------------------------------------------------------------------------------------------------------------------------------------------------------------------------------------------------------------------------------------------------------|----|----|---|----|----|
| <i>GSTT2</i><br>(2953)<br>22q11.23 | glutathione S-<br>transferase theta 2 | Conjugation of reduced glutathione to a wide number of exogenous and endogenous hydrophobic electrophiles.<br>Has a sulfatase activity. | <ul style="list-style-type: none"><li>involved in the conjugation of reduced glutathione to a wide number of exogenous and endogenous hydrophobic electrophiles</li><li>playing an important role in human carcinogenesis</li><li>acting as a sulfatase</li><li>participating in detoxification and defense mechanisms against toxic carcinogens and other compounds</li></ul> | ++ | ++ | + | ++ | ++ |
|------------------------------------|---------------------------------------|-----------------------------------------------------------------------------------------------------------------------------------------|--------------------------------------------------------------------------------------------------------------------------------------------------------------------------------------------------------------------------------------------------------------------------------------------------------------------------------------------------------------------------------|----|----|---|----|----|

---

---

*GSTP1*  
(2950)  
16p13.13

glutathione S-  
transferase pi 1

Conjugation of reduced glutathione to a wide number of exogenous and endogenous hydrophobic electrophiles. Involved in the formation of glutathione conjugates of both prostaglandin A2 (PGA2) and prostaglandin J2 (PGJ2). Participates in the formation of novel heptoxilin regioisomers. Regulates negatively CDK5 activity via p25/p35 translocation to prevent neurodegeneration.

- is a nucleo-cutoplasmic shuttling protein
- involved in regulation of mammalian cell growth
- mediating translation termination, and controlling the formation of the termination complex by modulating ETF1 protein stability
- GSPT1 is the major factor acting in translation termination in mammals and GSPT2 can substitute for GSPT1 in this function
- is a GTPase associated with ETF1 in a complex that mediates translation termination in eukaryotes
- eukaryotic translation termination is mediated by two interacting release factors, ETF1 and GSPT1, which act cooperatively to ensure efficient stop codon recognition and fast polypeptide release
- ETF1 recognizes the stop codon in the A site of the ribosome and promotes nascent peptide chain release, and the GTPase GSPT1 facilitates this peptide release via its interaction with ETF1
- plays pivotal roles in translation termination and post-termination events including ribosome recycling and mRNA decay
- could serve as a target in the regulation of gene expression
- functional interplay between two release factors, ETF1 and GSPT1, involved in eukaryotic translation termination, and GTP hydrolysis by GSTP1 couples codon recognition with peptidyl-tRNA hydrolysis by ETF1
- is a multifunctional protein that plays pivotal roles in translation termination as well as the initiation of mRNA decay, and also functions in the regulation of apoptosis
- is a novel regulator of cell death

++ ++ ++ - ++

---

|                                        |                                   |                                                                                                                                                                                                                                                                                                                                                                                                                                                                                                                                                                                                                                                                                                        |                                                                                                                                                                                                                                                                                                                             |         |    |    |    |    |
|----------------------------------------|-----------------------------------|--------------------------------------------------------------------------------------------------------------------------------------------------------------------------------------------------------------------------------------------------------------------------------------------------------------------------------------------------------------------------------------------------------------------------------------------------------------------------------------------------------------------------------------------------------------------------------------------------------------------------------------------------------------------------------------------------------|-----------------------------------------------------------------------------------------------------------------------------------------------------------------------------------------------------------------------------------------------------------------------------------------------------------------------------|---------|----|----|----|----|
| <i>GSTK1</i><br>(373156)<br>7q34       | glutathione S-transferase kappa 1 | Glutathione S-transferase that catalyzes the conjugation of glutathione to exogenous and endogenous compounds. Significant glutathione conjugating activity is found only with the model substrate, 1-chloro-2,4-dinitrobenzene (CDNB)                                                                                                                                                                                                                                                                                                                                                                                                                                                                 | <ul style="list-style-type: none"> <li>may have glutathione conjugating activity</li> </ul>                                                                                                                                                                                                                                 | +       | +  | ++ | ++ | ++ |
| <i>GSTA1</i><br>(2938)<br>6p12.2-p12.1 | glutathione S-transferase alpha 1 | Glutathione S-transferase that catalyzes the nucleophilic attack of the sulfur atom of glutathione on the electrophilic groups of a wide range of exogenous and endogenous compounds (Probable). Involved in the formation of glutathione conjugates of both prostaglandin A2 (PGA2) and prostaglandin J2 (PGJ2). It also catalyzes the isomerization of D5-androstene-3,17-dione (AD) into D4-androstene-3,17-dione and may therefore play an important role in hormone biosynthesis. Through its glutathione-dependent peroxidase activity toward the fatty acid hydroperoxide (13S)-hydroperoxy-(9Z,11E)-octadecadienoate/13-HPODE it is also involved in the metabolism of oxidized linoleic acid. | <ul style="list-style-type: none"> <li>conjugating reduced glutathione to a wide number of exogenous and endogenous hydrophobic electrophiles</li> <li>suppresses activation of JNK signalling by a pro-inflammatory cytokine and oxidative stress and have likely a protective role in JNK-associated apoptosis</li> </ul> | ++      | ++ | +  | ++ | ++ |
| <i>GSTA2</i><br>(2939)<br>6p12.2       | glutathione S-transferase alpha 2 | Catalyzes the conjugation of glutathione to a large variety of electrophilic compounds.                                                                                                                                                                                                                                                                                                                                                                                                                                                                                                                                                                                                                | <ul style="list-style-type: none"> <li>conjugating reduced glutathione to a wide number of exogenous and endogenous hydrophobic electrophiles</li> </ul>                                                                                                                                                                    | No Data |    |    |    |    |

|                                    |                                      |                                                                                                                                                                                                                                                                                                                                                                                                                                                      |                                                                                                                                                                                                                                                                                                                                                                                                                                                                                                                                                                                                                                                                       |    |    |    |     |    |
|------------------------------------|--------------------------------------|------------------------------------------------------------------------------------------------------------------------------------------------------------------------------------------------------------------------------------------------------------------------------------------------------------------------------------------------------------------------------------------------------------------------------------------------------|-----------------------------------------------------------------------------------------------------------------------------------------------------------------------------------------------------------------------------------------------------------------------------------------------------------------------------------------------------------------------------------------------------------------------------------------------------------------------------------------------------------------------------------------------------------------------------------------------------------------------------------------------------------------------|----|----|----|-----|----|
| <i>GSTA3</i><br>(2940)<br>6p12.1   | glutathione S-transferase<br>alpha 3 | Conjugation of reduced glutathione to a wide number of exogenous and endogenous hydrophobic electrophiles. Catalyzes isomerization reactions that contribute to the biosynthesis of steroid hormones. Efficiently catalyze obligatory double-bond isomerizations of delta5-androstene-3,17-dione and delta5-pregnene-3,20-dione, precursors to testosterone and progesterone, respectively. Has substantial activity toward aflatoxin B1-8,9-epoxide | <ul style="list-style-type: none"> <li>glutathione S-transferase activity</li> <li>may have a role in drug resistance</li> <li>play a role in cellular sex hormone production</li> </ul>                                                                                                                                                                                                                                                                                                                                                                                                                                                                              | ++ | ++ | +  | +++ | +  |
| <i>GSTA4</i><br>(2941)<br>6p12.1   | glutathione S-transferase<br>alpha 4 | Conjugation of reduced glutathione to a wide number of exogenous and endogenous hydrophobic electrophiles. This isozyme has a high catalytic efficiency with 4-hydroxyalkenals such as 4-hydroxynonenal (4-HNE).                                                                                                                                                                                                                                     | <ul style="list-style-type: none"> <li>glutathione S-transferase activity</li> <li>play an important role in the protection against oxidative stress</li> </ul>                                                                                                                                                                                                                                                                                                                                                                                                                                                                                                       | +  | -  | ++ | -   | -  |
| <i>GSTA5</i><br>(221357)<br>6p12.1 | glutathione S-transferase<br>alpha 5 | Catalytic Activity<br>glutathione + RX = a halide anion + an S-substituted glutathione + H+1                                                                                                                                                                                                                                                                                                                                                         | <ul style="list-style-type: none"> <li>unknown</li> </ul>                                                                                                                                                                                                                                                                                                                                                                                                                                                                                                                                                                                                             | ++ | ++ | ++ | +   | ++ |
| <i>GSTO1</i><br>(9446)<br>10q24.33 | glutathione S-transferase<br>omega 1 | Exhibits glutathione-dependent thiol transferase and dehydroascorbate reductase activities. Has S-(phenacyl)glutathione reductase activity. Has also glutathione S-transferase activity. Participates in the biotransformation of inorganic arsenic and reduces monomethylarsonic acid (MMA) and dimethylarsonic acid.                                                                                                                               | <ul style="list-style-type: none"> <li>small stress response protein likely involved in cellular redox homeostasis</li> <li>implicated in the post-translational processing and activation of the proinflammatory mediator interleukin-1B</li> <li>inhibitor of cardiac muscle ryanodine receptor Ca2+ channels</li> <li>nuclear translocation could be potentially involved in the stress response of human cells playing a role in the cancer progression of Barrett esophagus</li> <li>two isozymes (GSTO1 and GSTO2) have significant DHA reductase (DHAR) activity</li> <li>participates in the glutathionylation cycle and targets specific proteins</li> </ul> | ++ | -  | ++ | +++ | ++ |

|                                     |                                                    |                                                                                                                                                                                                                                                                                                                                                                          |                                                                                                                                                                                                                                                                                                                                                                             |     |    |    |     |    |
|-------------------------------------|----------------------------------------------------|--------------------------------------------------------------------------------------------------------------------------------------------------------------------------------------------------------------------------------------------------------------------------------------------------------------------------------------------------------------------------|-----------------------------------------------------------------------------------------------------------------------------------------------------------------------------------------------------------------------------------------------------------------------------------------------------------------------------------------------------------------------------|-----|----|----|-----|----|
| <i>GSTO2</i><br>(119391)<br>10q25.1 | glutathione S-transferase<br>omega 2               | Exhibits glutathione-dependent thiol transferase activity. Has high dehydroascorbate reductase activity and may contribute to the recycling of ascorbic acid. Participates in the biotransformation of inorganic arsenic and reduces monomethylarsonic acid (MMA).                                                                                                       | <ul style="list-style-type: none"> <li>• having glutathione transferase activity</li> <li>• may play an important role in cellular signaling</li> <li>• two isozymes (GSTO1 and GSTO2) have significant DHA reductase (DHAR) activity</li> </ul>                                                                                                                            | ++  | ++ | ++ | +   | ++ |
| <i>GSTZ1</i><br>(2954)<br>14q24.3   | glutathione S-transferase<br>zeta 1                | Bifunctional enzyme showing minimal glutathione-conjugating activity with ethacrynic acid and 7-chloro-4-nitrobenz-2-oxa-1,3-diazole and maleylacetoacetate isomerase activity. Has also low glutathione peroxidase activity with T-butyl and cumene hydroperoxides. Is able to catalyze the glutathione dependent oxygenation of dichloroacetic acid to glyoxylic acid. | <ul style="list-style-type: none"> <li>• glutathione-S-transferase</li> <li>• possessing glutathione peroxydase activity toward t-butyl and cumene hyperoxydes</li> <li>• possessing maleylacetoacetate isomerase activity</li> <li>• fundamental to the catabolism of aromatic AAs</li> <li>• last enzyme from the phenylalanine and tyrosine catabolic pathway</li> </ul> | +   | ++ | ++ | +++ | +  |
| <i>GCLC</i><br>(2729)<br>6p12       | Glutamate-cysteine<br>ligase, catalytic<br>subunit | Catalyzes the ATP-dependent ligation of L-glutamate and L-cysteine and participates in the first and rate-limiting step in glutathione biosynthesis. Catalytic Activity<br>ATP + L-cysteine + L-glutamate = ADP + gamma-L-glutamyl-L-cysteine + H <sup>+</sup> + phosphate <sup>2</sup>                                                                                  | <ul style="list-style-type: none"> <li>• catalyzing and limiting the first step of GSH synthesis, gamma-glutamyl cycle</li> </ul>                                                                                                                                                                                                                                           | +   | ++ | +  | ++  | +  |
| <i>GCLM</i><br>(14630)<br>1p22.1    | Glutamate-cysteine<br>ligase, modifier<br>subunit  | Pathway - Sulfur metabolism; glutathione biosynthesis; glutathione from L-cysteine and L-glutamate: step 1/2.                                                                                                                                                                                                                                                            | <ul style="list-style-type: none"> <li>• regulatory subunit, catalyzing the first step of GSH synthesis, gamma-glutamyl cycle</li> <li>• implicated in some forms of hemolytic anemia</li> </ul>                                                                                                                                                                            | +++ | ++ | ++ | ++  | ++ |
| <i>GSS</i><br>(2937)<br>20q11.21    | Glutathione<br>synthetase                          | Catalyzes the production of glutathione from gamma-glutamylcysteine and glycine in an ATP-dependent manner. Glutathione (gamma-glutamylcysteinylglycine, GSH) is the most abundant intracellular thiol in living aerobic cells and is required for numerous processes including the                                                                                      | <ul style="list-style-type: none"> <li>• essential tripeptide antioxidant, that protects against reactive oxygen species and participates in metabolism of drugs and carcinogens</li> <li>• involved in glutathione biosynthesis second step</li> <li>• plays an important role in defending the cell against reactive oxygen species</li> </ul>                            | ++  | +  | +  | ++  | +  |





|                                     |                                 |                                                                                                                                                                                                                                                                                                                                                                                                                                                                                                                                                                             |                                                                                                                                                                                                                                                                          |    |    |    |     |    |  |
|-------------------------------------|---------------------------------|-----------------------------------------------------------------------------------------------------------------------------------------------------------------------------------------------------------------------------------------------------------------------------------------------------------------------------------------------------------------------------------------------------------------------------------------------------------------------------------------------------------------------------------------------------------------------------|--------------------------------------------------------------------------------------------------------------------------------------------------------------------------------------------------------------------------------------------------------------------------|----|----|----|-----|----|--|
|                                     |                                 | acid + an N-terminal (5-L-glutamyl)-[peptide] = 5-L-glutamyl amino acid + N-terminal L-alpha-aminoacyl-[peptide]                                                                                                                                                                                                                                                                                                                                                                                                                                                            |                                                                                                                                                                                                                                                                          |    |    |    |     |    |  |
| <i>GGT2</i><br>(830119)<br>22q11    | Gamma-glutamyl transferase 2    | Lacks catalytic activity due to its inability to undergo the autocatalytic cleavage needed to produce a mature, enzymatically active heterodimer.                                                                                                                                                                                                                                                                                                                                                                                                                           | <ul style="list-style-type: none"> <li>• predictor of complications of atherosclerosis</li> </ul>                                                                                                                                                                        | ++ | ++ | +  | +++ | ++ |  |
| <i>GGT3</i><br>(843318)<br>22q11.21 | Gamma-glutamyl transferase 3    | Hydrolyzes and transfers gamma-glutamyl moieties from glutathione and other gamma-glutamyl compounds to acceptors.                                                                                                                                                                                                                                                                                                                                                                                                                                                          | NG                                                                                                                                                                                                                                                                       | +  | ++ | +  | +++ | ++ |  |
| <i>GGT5</i><br>(2687)<br>22q11.23   | Gamma-glutamyl transferase 5    | <p>Cleaves the gamma-glutamyl peptide bond of glutathione and glutathione-S-conjugate such as leukotriene C4.</p> <p>Does not cleaves gamma-glutamyl compounds such as gamma-glutamyl leucine.</p> <p>May also catalyze a transpeptidation reaction in addition to the hydrolysis reaction, transferring the gamma-glutamyl moiety to an acceptor amino acid to form a new gamma-glutamyl compound.</p> <p>Acts as a negative regulator of geranylgeranyl glutathione bioactivity by cleaving off its gamma-glutamyl group, playing a role in adaptive immune responses</p> | <ul style="list-style-type: none"> <li>• gamma-glutamyltransferase-like 1 activity</li> <li>• hydrolyzing the gamma-gmutamyl moiety of glutathione</li> <li>• cleaving the gamma-glutamyl linkage of leukotriene C4 and most likely, other naturals compounds</li> </ul> | ++ | ++ | ++ | ++  | ++ |  |
| <i>GGT6</i><br>(124975)<br>17p13.2  | Gamma-glutamyl transferase 6    | Hydrolyzes and transfers gamma-glutamyl moieties from glutathione and other gamma-glutamyl compounds to acceptors.                                                                                                                                                                                                                                                                                                                                                                                                                                                          | <ul style="list-style-type: none"> <li>• having gammaglutamyl transferase activity</li> </ul>                                                                                                                                                                            | ++ | ++ | ++ | +   | ++ |  |
| <i>GGT7</i><br>(2686)<br>20q11.22   | Gamma-glutamyl transferase 7    | Hydrolyzes and transfers gamma-glutamyl moieties from glutathione and other gamma-glutamyl compounds to acceptors.                                                                                                                                                                                                                                                                                                                                                                                                                                                          | <ul style="list-style-type: none"> <li>• playing a key role in the gamma-glutamyl cycle, a pathway for the synthesis and degradation of glutathione</li> </ul>                                                                                                           | ++ | ++ | ++ | +   | ++ |  |
| <i>GGCT</i><br>(79017)              | Gamma-glutamyl cyclotransferase | Catalyzes the formation of 5-oxoproline from gamma-glutamyl dipeptides and                                                                                                                                                                                                                                                                                                                                                                                                                                                                                                  | <ul style="list-style-type: none"> <li>• catalyzes the formation of 5-oxoproline (pyroglutamic acid) from gamma-glutamyl</li> </ul>                                                                                                                                      | ++ | -  | ++ | +   | +  |  |

|                                     |                                                 |                                                                                                                                                                                                                                               |                                                                                                                                                                                                                                                                                                                                                                                                                                                                                                                                                                                                                                                                                                                                                                                                                                                                                                                                                                                                                                                                   |    |    |    |    |    |    |
|-------------------------------------|-------------------------------------------------|-----------------------------------------------------------------------------------------------------------------------------------------------------------------------------------------------------------------------------------------------|-------------------------------------------------------------------------------------------------------------------------------------------------------------------------------------------------------------------------------------------------------------------------------------------------------------------------------------------------------------------------------------------------------------------------------------------------------------------------------------------------------------------------------------------------------------------------------------------------------------------------------------------------------------------------------------------------------------------------------------------------------------------------------------------------------------------------------------------------------------------------------------------------------------------------------------------------------------------------------------------------------------------------------------------------------------------|----|----|----|----|----|----|
| 7p15-p14                            |                                                 | may play a significant role in glutathione homeostasis.<br>Induces release of cytochrome c from mitochondria with resultant induction of apoptosis.                                                                                           | <ul style="list-style-type: none"> <li>dipeptides and potentially plays a significant role in glutathione homeostasis</li> <li>may play an important role in the induction of apoptosis by GGO in leukemia U937 cells</li> <li>could play a significant role in regulating the synthesis of glutathione by limiting the availability of -glutamylcysteine</li> </ul>                                                                                                                                                                                                                                                                                                                                                                                                                                                                                                                                                                                                                                                                                              |    |    |    |    |    |    |
| <i>OPLAH</i><br>(26873)<br>8q24     | 5-oxoprolinase<br>(ATP-hydrolysing)             | Catalyzes the cleavage of 5-oxo-L-proline to form L-glutamate coupled to the hydrolysis of ATP to ADP and inorganic phosphate. Catalytic Activity 5-oxo-L-proline + ATP + 2 H <sub>2</sub> O = ADP + H <sup>+</sup> + L-glutamate + phosphate | <ul style="list-style-type: none"> <li>catalyzing the cleavage of 5-oxo-L-proline to form L-glutamate coupled to the hydrolysis of ATP to ADP and inorganic phosphate</li> </ul>                                                                                                                                                                                                                                                                                                                                                                                                                                                                                                                                                                                                                                                                                                                                                                                                                                                                                  | ++ | ++ | ++ | ++ | ++ | ++ |
| <i>SLC7A11</i><br>(23657)<br>4q28.3 | solute carrier family<br>7 member 11            | Sodium-independent, high-affinity exchange of anionic amino acids with high specificity for anionic form of cystine and glutamate.                                                                                                            | <ul style="list-style-type: none"> <li>involved in sodium-independent, high-affinity exchange of anionic amino acids with high specificity</li> <li>for anionic form of cystine and glutamate</li> <li>major genetic regulator of pheomelanin pigment in hair and melanocytes, with minimal or no effects on eumelanin, and controlling the production of pheomelanin pigment</li> <li>directly</li> <li>has a critical role in the generation of glutathione and the protection of cells from oxidative stress</li> <li>promotes cystine uptake and glutathione biosynthesis, resulting in protection from oxidative stress and ferroptotic cell death</li> <li>also plays critical roles in glutamine metabolism and regulates the glucose and glutamine dependency of cancer cells</li> <li>ferroptosis is triggered by lipid peroxidation and is tightly regulated by SLC7A11, a key component of the cystine-glutamate antiporter</li> <li>imports extracellular cystine into cells to promote glutathione synthesis, thus inhibiting ferroptosis</li> </ul> | +  | ++ | +  | ++ | ++ | ++ |
| <i>ABCC1</i><br>(4363)<br>16p13.11  | ATP binding<br>cassette subfamily<br>C member 1 | Mediates export of organic anions and drugs from the cytoplasm.<br>Mediates ATP-dependent transport of                                                                                                                                        | <ul style="list-style-type: none"> <li>ATP-binding cassette transporter that confers resistance to drugs(colchicine doxorubicine) and mediates the transport of organic anions</li> </ul>                                                                                                                                                                                                                                                                                                                                                                                                                                                                                                                                                                                                                                                                                                                                                                                                                                                                         | +  | ++ | ++ | ++ | ++ | ++ |





|                          |                                                                                                                                                                                                                                                                                                 |                                                                                                                                                                                                                                                                                                                                                                                                                                                                                                                                                                                                                                                                                                                                                                                                                                                                                                                                                                                                                                                                                                                                                                                                                                                                                                                                                                                                                                                      |    |     |     |     |   |  |
|--------------------------|-------------------------------------------------------------------------------------------------------------------------------------------------------------------------------------------------------------------------------------------------------------------------------------------------|------------------------------------------------------------------------------------------------------------------------------------------------------------------------------------------------------------------------------------------------------------------------------------------------------------------------------------------------------------------------------------------------------------------------------------------------------------------------------------------------------------------------------------------------------------------------------------------------------------------------------------------------------------------------------------------------------------------------------------------------------------------------------------------------------------------------------------------------------------------------------------------------------------------------------------------------------------------------------------------------------------------------------------------------------------------------------------------------------------------------------------------------------------------------------------------------------------------------------------------------------------------------------------------------------------------------------------------------------------------------------------------------------------------------------------------------------|----|-----|-----|-----|---|--|
|                          | Tert-butyl hydroperoxide, cumene hydroperoxide and linoleic acid hydroperoxide but not phosphatidycholine hydroperoxide, can act as acceptors<br>Catalytic Activity<br>$\text{a hydroperoxide} + 2 \text{ glutathione} = \text{an alcohol} + \text{glutathione disulfide} + \text{H}_2\text{O}$ | redox agents and catabolic pathway of activated oxygen species                                                                                                                                                                                                                                                                                                                                                                                                                                                                                                                                                                                                                                                                                                                                                                                                                                                                                                                                                                                                                                                                                                                                                                                                                                                                                                                                                                                       |    |     |     |     |   |  |
| Glutathione peroxidase 3 |                                                                                                                                                                                                                                                                                                 | <ul style="list-style-type: none"> <li>involved in free radical detoxification and reduction of hydrogen peroxide</li> <li>catalyzing the reduction of hydrogen peroxide, organic hydroperoxide, and lipid peroxides by reduced glutathione</li> <li>functioning in the protection of cells against oxidative damage</li> <li>having potent extracellular antioxidant activity</li> <li>major antioxidant enzyme that was induced upon nontoxic proteasome inhibition in endothelial cells</li> <li>borderline defense mechanism of endothelial cell-derived GPx-3 to protect the vasculature from oxidative stress</li> <li>GPX5 protein, and the epithelial proteins GPX1, GPX3, and cellular GPX4, all functioning in the mammalian epididymis at different stages of the sperm epididymal journey, and in different epididymis compartments</li> <li>from the blood binds to basement membranes of specific epithelial cells and the cells modify their basement membranes to cause the binding</li> <li>importance of this plasma antioxidant enzyme in regulating platelet activity, endothelial function, platelet-dependent thrombosis, and vascular thrombotic propensity</li> <li>plasma antioxidant enzyme, maintaining genomic integrity by inactivating reactive oxygen species (ROS), known DNA-damaging agents and mediators of cancer chemotherapy response</li> <li>new retinoid target gene, crucial for human skeletal</li> </ul> |    |     |     |     |   |  |
| GPX3<br>(2878)<br>5q33.1 | Protects cells and enzymes from oxidative damage, by catalyzing the reduction of hydrogen peroxide, lipid peroxides and organic hydroperoxide, by glutathione. Catalytic Activity $2 \text{ glutathione} + \text{H}_2\text{O}_2 = \text{glutathione disulfide} + 2 \text{ H}_2\text{O}$         |                                                                                                                                                                                                                                                                                                                                                                                                                                                                                                                                                                                                                                                                                                                                                                                                                                                                                                                                                                                                                                                                                                                                                                                                                                                                                                                                                                                                                                                      | ++ | +++ | +++ | +++ | - |  |





|                            |                          |                                                                                                                                                                                                                                                                                                                                                       |                                                                                                                                                                                                                                                                                                                                                                                                                                                                                                                                                                                                                                                                                                                                                                                                                                                                                                                                                                                                                                                                                                                                                                                                                                                                                                                                                                                                                                                                                                |    |         |    |    |    |  |  |
|----------------------------|--------------------------|-------------------------------------------------------------------------------------------------------------------------------------------------------------------------------------------------------------------------------------------------------------------------------------------------------------------------------------------------------|------------------------------------------------------------------------------------------------------------------------------------------------------------------------------------------------------------------------------------------------------------------------------------------------------------------------------------------------------------------------------------------------------------------------------------------------------------------------------------------------------------------------------------------------------------------------------------------------------------------------------------------------------------------------------------------------------------------------------------------------------------------------------------------------------------------------------------------------------------------------------------------------------------------------------------------------------------------------------------------------------------------------------------------------------------------------------------------------------------------------------------------------------------------------------------------------------------------------------------------------------------------------------------------------------------------------------------------------------------------------------------------------------------------------------------------------------------------------------------------------|----|---------|----|----|----|--|--|
|                            |                          |                                                                                                                                                                                                                                                                                                                                                       | sperm epididymal journey, and in different epididymis compartments                                                                                                                                                                                                                                                                                                                                                                                                                                                                                                                                                                                                                                                                                                                                                                                                                                                                                                                                                                                                                                                                                                                                                                                                                                                                                                                                                                                                                             |    |         |    |    |    |  |  |
| GPX6<br>(257202)<br>6p22.1 | Glutathione peroxidase 6 | Catalytic Activity<br>2 glutathione + H <sub>2</sub> O <sub>2</sub> = glutathione disulfide + 2 H <sub>2</sub> O                                                                                                                                                                                                                                      | <ul style="list-style-type: none"><li>protecting cells and enzymes from oxidative damage, by catalyzing the reduction of hydrogen peroxide, lipid peroxides and organic hydroperoxide, by glutathione</li></ul>                                                                                                                                                                                                                                                                                                                                                                                                                                                                                                                                                                                                                                                                                                                                                                                                                                                                                                                                                                                                                                                                                                                                                                                                                                                                                |    | No data |    |    |    |  |  |
| GPX7<br>(2882)<br>1p32.3   | Glutathione peroxidase 7 | <p>It protects esophageal epithelia from hydrogen peroxide-induced oxidative stress. It suppresses acidic bile acid-induced reactive oxigen species (ROS) and protects against oxidative DNA damage and double-strand breaks.</p> <p>Catalytic Activity<br/>2 glutathione + H<sub>2</sub>O<sub>2</sub> = glutathione disulfide + 2 H<sub>2</sub>O</p> | <ul style="list-style-type: none"><li>lutathione peroxidase activity</li><li>plays an essential role in breast cancer cells in alleviating oxidative stress generated from polyunsaturated fatty acid metabolism</li><li>GPX7 and GPX8 may represent a novel route for the productive use of peroxide produced by ERO1A during disulfide bond formation</li><li>is a newly identified stress sensor that transmits oxidative stress signals by forming the disulfide bond between its Cys57 and Cys86 residues</li><li>is a monomeric glutathione peroxidase of the endoplasmic reticulum (ER), containing a Cys redox center (CysGPx)</li><li>in the ER, the emerging physiological role of GPX7 is oxidation of protein disulfide isomerase (HsPDI), modulated by the amount of GSH (reduced glutathione)</li><li>possesses tumour suppressor functions in oesophageal adenocarcinomas (OAC)</li><li>protects against fat accumulation via modulating ROS, suggesting the importance of targeting redox homeostasis in obesity management</li><li>GPX7 and GPX8 are unique homologs that contain a peroxidatic Cys (CP)</li><li>displays a unique function which serves as a stress sensor/transmitter to transfer the signal to its interacting proteins by shuttling disulfide bonds in response to various stresses</li><li>role of GPX7 in the maintenance of redox homeostasis</li><li>epigenetic silencing of GPX7 could play an important role in gastric tumorigenesis and</li></ul> | ++ | ++      | ++ | ++ | ++ |  |  |



|                                   |                        |                                                                                                                                                                                                                                                                                                                                                                                 | progression                                                                                                                                                                                                                                                                                                                                                                                                                                                                                                                                                                                                                                                                                                                                                                                                                                                                                                                                                                                                                                                                                                                                            |    |   |    |     |     |
|-----------------------------------|------------------------|---------------------------------------------------------------------------------------------------------------------------------------------------------------------------------------------------------------------------------------------------------------------------------------------------------------------------------------------------------------------------------|--------------------------------------------------------------------------------------------------------------------------------------------------------------------------------------------------------------------------------------------------------------------------------------------------------------------------------------------------------------------------------------------------------------------------------------------------------------------------------------------------------------------------------------------------------------------------------------------------------------------------------------------------------------------------------------------------------------------------------------------------------------------------------------------------------------------------------------------------------------------------------------------------------------------------------------------------------------------------------------------------------------------------------------------------------------------------------------------------------------------------------------------------------|----|---|----|-----|-----|
| <i>CAT</i><br>(847)<br>11p13      | Catalase               | Occurs in almost all aerobically respiring organisms and serves to protect cells from the toxic effects of hydrogen peroxide. Promotes growth of cells including T-cells, B-cells, myeloid leukemia cells, melanoma cells, mastocytoma cells and normal and transformed fibroblast cells.<br>Catalytic Activity<br>$2 \text{H}_2\text{O}_2 = 2 \text{H}_2\text{O} + \text{O}_2$ | <ul style="list-style-type: none"><li>involved in catabolic pathway of activated oxygen species and free radical detoxification</li><li>catalase overexpression has a protective role against UVB irradiation by preventing DNA damage mediated by the late ROS increase</li><li>catalase is an antioxidant enzyme the activity of which is crucial for the protection against damage caused by reactive oxygen species</li><li>heme enzymes, which catalyze decomposition of hydrogen peroxide to water and molecular oxygen</li><li>is an important antioxidant enzyme that dismutates hydrogen peroxide into water and molecular oxygen</li><li>catalase is a key enzyme in the metabolism of H2O2 and reactive nitrogen species, and its expression and localization is markedly altered in tumors</li><li>major peroxisome protein, plays a critical role in removing peroxisome-generated reactive oxygen species (ROS) produced by peroxisome enzymes</li><li>catalase plays an important role in pexophagy during nutrient deprivation</li><li>potential therapeutic effects in nonalcoholic fatty liver disease (NAFLD) progression</li></ul> | ++ | - | ++ | +++ | +++ |
| <i>SOD1</i><br>(6647)<br>21q22.11 | superoxide dismutase 1 | Destroys radicals which are normally produced within the cells and which are toxic to biological systems.                                                                                                                                                                                                                                                                       | <ul style="list-style-type: none"><li>catabolic pathway of activated oxygen species,free radical detoxification</li><li>role in human placenta development (</li><li>may play a role in the regulation of cellular lifespan by p53 and may also regulate the death signals in cancer cells (</li><li>involved in the function of motor neuron</li><li>an important biological role for this enzyme in the preservation of mitochondrial homeostasis (</li><li>cuproenzyme that catalyzes the dismutation of the toxic superoxide anion, a byproduct of cellular respiration</li><li>functioning as a molecular switch that activates the ER stress response, which plays an important role in cellular homeostasis under zinc-deficient conditions</li></ul>                                                                                                                                                                                                                                                                                                                                                                                           | ++ | - | +  | ++  | ++  |

|                                       |                           |                                                                                                                                                                                                                                                         |                                                                                                                                                                                                                                                                                                                                                                                                                                                                                                                                                                                                                                                                                                                                                                                                                                                                                                                                                                                                                                                                                                                                   |     |    |     |    |     |
|---------------------------------------|---------------------------|---------------------------------------------------------------------------------------------------------------------------------------------------------------------------------------------------------------------------------------------------------|-----------------------------------------------------------------------------------------------------------------------------------------------------------------------------------------------------------------------------------------------------------------------------------------------------------------------------------------------------------------------------------------------------------------------------------------------------------------------------------------------------------------------------------------------------------------------------------------------------------------------------------------------------------------------------------------------------------------------------------------------------------------------------------------------------------------------------------------------------------------------------------------------------------------------------------------------------------------------------------------------------------------------------------------------------------------------------------------------------------------------------------|-----|----|-----|----|-----|
| <i>SOD2</i><br>(6648)<br>6q25.3       | superoxide<br>dismutase 2 | Catalytic Activity<br>$2\text{H}^+ + 2\text{superoxide} = \text{H}_2\text{O}_2 + \text{O}_2$                                                                                                                                                            | <ul style="list-style-type: none"> <li>manganese superoxide dismutase catabolic pathway of activated oxygen species, free radical detoxification</li> <li>destroying radical which are normally produced within the cells and which are toxic to biological system</li> <li>acting as an iron toxicity modifier</li> <li>function as the first line of antioxidant defense against highly reactive superoxide radicals</li> <li>with MIF appear to be early predictors for survival in septic patients</li> <li>binds with ubiquitin molecules to form polyubiquitination chains and undergoes degradation through the ubiquitin-proteasomal pathway</li> <li>major mitochondrial antioxidative enzyme, constituting an important control switch in the process of activation-induced oxidative signal generation in T cells</li> <li>critical role for SOD2 and mitochondria in the regulation of human T cell activation</li> <li>regulates a "metabolic switch" during progression from quiescent through the proliferative cycle</li> <li>is potentially a new molecular player contributing to the Warburg effect</li> </ul> | +++ | ++ | ++  | ++ | +++ |
| <i>SOD3</i><br>(6649)<br>4p15.3-p15.1 | superoxide<br>dismutase 3 | Protect the extracellular space from toxic effect of reactive oxygen intermediates by converting superoxide radicals into hydrogen peroxide and oxygen.<br>Catalytic Activity<br>$2\text{H}^+ + 2\text{superoxide} = \text{H}_2\text{O}_2 + \text{O}_2$ | <ul style="list-style-type: none"> <li>antioxidant enzymes that catalyze the dismutation of two superoxide radicals into hydrogen peroxide and oxygen</li> <li>involved in catabolic pathway of activated oxygen species, and free radical detoxification</li> <li>may be protecting the brain, lungs, and other tissues from oxidative stress</li> <li>tetrameric metalloenzyme responsible for the removal of superoxide anions from the extracellular space</li> </ul>                                                                                                                                                                                                                                                                                                                                                                                                                                                                                                                                                                                                                                                         | ++  | ++ | +++ | ++ | +   |
| <i>PRDX1</i><br>(5052)<br>1p34.1      | peroxiredoxin 1           | Thiol-specific peroxidase that catalyzes the reduction of hydrogen peroxide and organic hydroperoxides to water and                                                                                                                                     | <ul style="list-style-type: none"> <li>playing a role in elimination of peroxides generated during metabolism</li> <li>having a function in apoptosis signal-regulating</li> </ul>                                                                                                                                                                                                                                                                                                                                                                                                                                                                                                                                                                                                                                                                                                                                                                                                                                                                                                                                                | ++  | -  | ++  | +  | +   |

---

alcohols, respectively. Plays a role in cell protection against oxidative stress by detoxifying peroxides and as sensor of hydrogen peroxide-mediated signaling events. Might participate in the signaling cascades of growth factors and tumor necrosis factor- $\alpha$  by regulating the intracellular concentrations of  $H_2O_2$ . Reduces an intramolecular disulfide bond in GDPD5 that gates the ability to GDPD5 to drive postmitotic motor neuron differentiation.

- kinase 1 (MAP3K5)-mediated signaling pathway
  - have a role in both the resistance of certain cancers to therapy and quite a different role in possibly slowing the progression of neurodegenerative
  - having a function in apoptosis signal-regulating kinase 1 (MAP3K5)-mediated signaling pathway
  - peroxidase function of PRDX1 is involved in regulating RAS-induced transformation
  - pivotal regulator of GDPD5 activity, suggesting roles for coupled thiol-redox-dependent cascades in controlling neuronal differentiation in the spinal cord
  - catalyze peroxide reduction of  $H_2O_2$ , organic hydroperoxides and peroxyxynitrite
  - involved in the cellular protection against oxidative stress, the modulation of intracellular signalling cascades as well as the regulation of cell proliferation and apoptosis
  - essential for preventing respiratory syncytial virus-induced oxidative damage in a subset of nuclear intermediate filament and actin binding proteins in epithelial cells
  - PRDX1-stimulated endothelial cell proliferation, migration, and differentiation in a TLR4- and VEGF-dependent manner
  - role in regulating TGF $\beta$ 1-induced epithelial-to-mesenchymal transition (EMT)
  - detoxifies peroxide substrates and has been implicated in numerous biological processes, including cell growth, proliferation, differentiation, apoptosis, and redox signaling
  - may perform biological functions as a RNA-binding protein, which are distinctive from known functions of PRDX1 as a reactive oxygen species scavenger
  - novel role of PRDX1 in phagocytosis of macrophage
  - orchestrates potentially redox signaling in an H&8322; dose-dependent manner through the oxidation status of its peroxidatic cysteine Cys52
-



|                              |                 |                                                                                                                                                                                                                                                                                                                                                                                                       |                                                                                                                                                                                                                                                                                                                                                                                                                                                                                                                                                                                                                                                                                                                                                                                                                                                    |    |    |    |     |    |  |
|------------------------------|-----------------|-------------------------------------------------------------------------------------------------------------------------------------------------------------------------------------------------------------------------------------------------------------------------------------------------------------------------------------------------------------------------------------------------------|----------------------------------------------------------------------------------------------------------------------------------------------------------------------------------------------------------------------------------------------------------------------------------------------------------------------------------------------------------------------------------------------------------------------------------------------------------------------------------------------------------------------------------------------------------------------------------------------------------------------------------------------------------------------------------------------------------------------------------------------------------------------------------------------------------------------------------------------------|----|----|----|-----|----|--|
|                              |                 |                                                                                                                                                                                                                                                                                                                                                                                                       | <ul style="list-style-type: none"> <li>polarity, and also to affect wound healing</li> <li>PRDX2 functions are modulated in response to oxidative stress in diseased Red blood cells</li> <li>protects cells from deleterious oxidative damage</li> <li>PRDX2 and PRDX4 are negative regulators of hypoxia-inducible factors under conditions of prolonged hypoxia</li> </ul>                                                                                                                                                                                                                                                                                                                                                                                                                                                                      |    |    |    |     |    |  |
| PRDX3<br>(10935)<br>10q26.11 | peroxiredoxin 3 | Thiol-specific peroxidase that catalyzes the reduction of hydrogen peroxide and organic hydroperoxides to water and alcohols, respectively. Plays a role in cell protection against oxidative stress by detoxifying peroxides. Acts synergistically with MAP3K13 to regulate the activation of NF-kappa-B in the cytosol.                                                                             | <ul style="list-style-type: none"> <li>may be involved in the regulation of cellular proliferation, differentiation and antioxidant functions</li> <li>regulating erythroid differentiation (late stage of proerythrocyte differentiation)</li> <li>critical regulator of the abundance of mitochondrial H<sub>2</sub>O<sub>2</sub>, which itself promotes apoptosis in cooperation with other mediators of apoptotic signaling</li> <li>may be important in protecting photoreceptor mitochondria especially in blue cones</li> <li>PRDX3 and PRDX4, may act as new placental immune targets, and are involved in recurrent pregnancy loss</li> </ul>                                                                                                                                                                                             | ++ | ++ | +  | ++  | ++ |  |
| PRDX4<br>(10549)<br>Xp22.11  | peroxiredoxin 4 | Thiol-specific peroxidase that catalyzes the reduction of hydrogen peroxide and organic hydroperoxides to water and alcohols, respectively. Plays a role in cell protection against oxidative stress by detoxifying peroxides and as sensor of hydrogen peroxide-mediated signaling events. Regulates the activation of NF-kappa-B in the cytosol by a modulation of I-kappa-B-alpha phosphorylation. | <ul style="list-style-type: none"> <li>playing a regulatory role in the activation of the transcription factor NF-kappaB</li> <li>involved in protection against oxidative stress through the detoxification of cellular peroxides</li> <li>endoplasmic reticulum-localized enzyme forming oligomeric complexes in human cells</li> <li>important for spermatogenesis, but not an absolute requisite</li> <li>essential for preventing respiratory syncytial virus-induced oxidative damage in a subset of nuclear intermediate filament and actin binding proteins in epithelial cells</li> <li>ER-localized and implicated in a previously unanticipated, parallel, ERO1-independent pathway that couples hydroperoxide production to oxidative protein folding in mammalian cells</li> <li>PRDX3 and PRDX4, may act as new placental</li> </ul> | ++ | -  | ++ | +++ | -  |  |

|                             |                 |                                                                                                                                                                                                                                                                                                                                                                                                                                                                                                                                                                                                                                                                                                                                                                                                                                                                                                                                                                                                                                                                                                                                                                                                                                                                                                                                                                                         |         |
|-----------------------------|-----------------|-----------------------------------------------------------------------------------------------------------------------------------------------------------------------------------------------------------------------------------------------------------------------------------------------------------------------------------------------------------------------------------------------------------------------------------------------------------------------------------------------------------------------------------------------------------------------------------------------------------------------------------------------------------------------------------------------------------------------------------------------------------------------------------------------------------------------------------------------------------------------------------------------------------------------------------------------------------------------------------------------------------------------------------------------------------------------------------------------------------------------------------------------------------------------------------------------------------------------------------------------------------------------------------------------------------------------------------------------------------------------------------------|---------|
|                             |                 | <p>immune targets, and are involved in recurrent pregnancy loss</p> <ul style="list-style-type: none"> <li>• different binding properties of ERO1A and PRDX4 increase the robustness of ER redox homeostasis</li> <li>• may have a close relationship with follicular development</li> <li>• PRDX4-recycling in the endoplasmic reticulum is much less efficient than in the cytosol or mitochondria, leading to the protection of PRDX4 from hyperoxidation</li> <li>• ER-specific antioxidative peroxidase that can utilize luminal H<sub>2</sub>O<sub>2</sub> as driving force for reoxidizing protein disulfide isomerase family members, thus efficiently contributing to disulfide bond formation</li> <li>• important role of PRDX4 in maintaining insulin levels and improving the ER folding capacity also under conditions of a high insulin requirement</li> <li>• functions not only to eliminate peroxide but also to promote oxidative protein folding via oxidizing protein disulfide isomerase (PDI)</li> <li>• novel function of secreted PRDX4 in mediating osteoclast activation by cancer cells</li> <li>• PRDX4 oxidative activity acts as a sensor to directly couple neuronal differentiation with redox environments in the ER</li> <li>• PRDX2 and PRDX4 are negative regulators of hypoxia-inducible factors under conditions of prolonged hypoxia</li> </ul> |         |
| PRDX5<br>(25824)<br>11q13.1 | peroxiredoxin 5 | <p>Thiol-specific peroxidase that catalyzes the reduction of hydrogen peroxide and organic hydroperoxides to water and alcohols, respectively. Plays a role in cell protection against oxidative stress by detoxifying peroxides and as sensor of hydrogen peroxide-mediated signaling events.</p> <ul style="list-style-type: none"> <li>• peroxynitrite reductase, playing an antioxidant protective role in various tissues under nonpathologic conditions and during inflammatory processes</li> <li>• reducing hydrogen peroxide and alkyl hydroperoxides with reducing equivalents provided through the thioredoxin system</li> <li>• protecting mitochondrial DNA (mtDNA) from oxidative attacks</li> <li>• may play an important role in mitochondrial genome</li> </ul>                                                                                                                                                                                                                                                                                                                                                                                                                                                                                                                                                                                                        | No data |









|                              |                                         |                                                                                                                                                                                                                                                                                                                                                                                                                                                                                                                                                                                                                                                                                                                             |                                                                                                                                                                                                                                                                                                                                                                                                                                                                                                                                                                                     |    |    |    |     |    |  |
|------------------------------|-----------------------------------------|-----------------------------------------------------------------------------------------------------------------------------------------------------------------------------------------------------------------------------------------------------------------------------------------------------------------------------------------------------------------------------------------------------------------------------------------------------------------------------------------------------------------------------------------------------------------------------------------------------------------------------------------------------------------------------------------------------------------------------|-------------------------------------------------------------------------------------------------------------------------------------------------------------------------------------------------------------------------------------------------------------------------------------------------------------------------------------------------------------------------------------------------------------------------------------------------------------------------------------------------------------------------------------------------------------------------------------|----|----|----|-----|----|--|
|                              |                                         | repolymerization. Plays a role in innate immunity by reducing oxidized actin, leading to actin repolymerization in macrophages.<br>Catalytic Activity<br>[thioredoxin]-disulfide + H2O + L-methionyl-[protein] = [thioredoxin]-dithiol + L-methionyl-(R)-S-oxide-[protein]By Similarity                                                                                                                                                                                                                                                                                                                                                                                                                                     | as a modulator of TRPM6 during oxidative stress                                                                                                                                                                                                                                                                                                                                                                                                                                                                                                                                     |    |    |    |     |    |  |
| MSRB2<br>(22921)<br>10p12.2  | methionine<br>sulfoxide reductase<br>B2 | Methionine-sulfoxide reductase that specifically reduces methionine (R)-sulfoxide back to methionine. While in many cases, methionine oxidation is the result of random oxidation following oxidative stress, methionine oxidation is also a post-translational modification that takes place on specific residue. Upon oxidative stress, may play a role in the preservation of mitochondrial integrity by decreasing the intracellular reactive oxygen species build-up through its scavenging role, hence contributing to cell survival and protein maintenance.<br>Catalytic Activity<br>[thioredoxin]-disulfide + H2O + L-methionyl-[protein] = [thioredoxin]-dithiol + L-methionyl-(R)-S-oxide-[protein]By Similarity | <ul style="list-style-type: none"><li>specifically reducing methionine-R-sulfoxide</li><li>with SEPX1, and MSRB3, required for lens cell viability, and their silencing in lens cells results in increased oxidative-stress-induced cell death</li><li>important as antioxidant/repair systems for neutrophils, cells with enormous capacity for the generation of reactive oxidants and hence, susceptible to oxidative damage</li><li>repair enzymes that protect proteins from oxidative stress by catalyzing stereospecific reduction of oxidized methionine residues</li></ul> | +  | ++ | ++ | +++ | ++ |  |
| MSRB3<br>(253827)<br>12q14.3 | methionine<br>sulfoxide reductase<br>B3 | Catalyzes the reduction of free and protein-bound methionine sulfoxide to methionine. Isoform 2 is essential for hearing.<br>Catalytic Activity<br>[thioredoxin]-disulfide + H2O + L-methionyl-[protein] = [thioredoxin]-dithiol + L-methionyl-(R)-S-oxide-[protein]                                                                                                                                                                                                                                                                                                                                                                                                                                                        | <ul style="list-style-type: none"><li>catalyzes the reduction of free and protein-bound methionine sulfoxide to methionine</li><li>with SEPX1, and MSRB2, required for lens cell viability, and their silencing in lens cells results in increased oxidative-stress-induced cell death</li><li>important as antioxidant/repair systems for neutrophils, cells with enormous capacity for the generation of reactive oxidants and hence, susceptible to oxidative damage</li><li>repair enzymes that protect proteins from oxidative</li></ul>                                       | ++ | ++ | ++ | +   | ++ |  |

- stress by catalyzing stereospecific reduction of oxidized methionine residues
- MSRB3-catalyzed reduction of methionine sulfoxides to methionine is essential for hearing

<sup>1</sup> Human Gene Nomenclature Committee (<https://www.genenames.org/>); <sup>2</sup> Entrez Gene (<https://www.ncbi.nlm.nih.gov/gene/>); <sup>3</sup> UniProt (<https://www.uniprot.org/>);

<sup>4</sup> GENATLAS (<http://genatlas.medecine.univ-paris5.fr/>); <sup>5</sup> BioGPS (<http://biogps.org/>). The number of the “+” symbols means the level of gene expression in the tissues/organs playing a role in the pathogenesis of type 2 diabetes: low (+), medium (++) and high (+++). “-” depicts that the gene expression is too low or not detected (<0.5 Me).

Low expression: >0.5 Me, <1 Me; medium expression: >1 Me, <10 Me; high expression: >10 Me.

#### Biological functions and tissue-specific gene expression of oxidative enzymes

| Approved gene symbol <sup>1</sup><br>(Gene ID) <sup>2</sup><br>Chromosomal location <sup>2</sup> | Approved gene name <sup>1</sup><br>(protein name) <sup>3</sup> | Enzyme/protein function <sup>3</sup>                                                                                                                                                                                                                                                                                                                                                                                                                                                                                                                                                                                                                                                                                                                                                                                                                                                                                                                                                                                                                          | Basic function <sup>4</sup>                                                                                                                     | Tissue gene expression <sup>5</sup> |                 |                |       |             |
|--------------------------------------------------------------------------------------------------|----------------------------------------------------------------|---------------------------------------------------------------------------------------------------------------------------------------------------------------------------------------------------------------------------------------------------------------------------------------------------------------------------------------------------------------------------------------------------------------------------------------------------------------------------------------------------------------------------------------------------------------------------------------------------------------------------------------------------------------------------------------------------------------------------------------------------------------------------------------------------------------------------------------------------------------------------------------------------------------------------------------------------------------------------------------------------------------------------------------------------------------|-------------------------------------------------------------------------------------------------------------------------------------------------|-------------------------------------|-----------------|----------------|-------|-------------|
|                                                                                                  |                                                                |                                                                                                                                                                                                                                                                                                                                                                                                                                                                                                                                                                                                                                                                                                                                                                                                                                                                                                                                                                                                                                                               |                                                                                                                                                 | Pancreas                            | Skeletal muscle | Adipose tissue | Liver | Whole blood |
| <i>LPO</i><br>(4025)<br>17q23.1                                                                  | lactoperoxidase                                                | <p>Heme-containing oxidoreductase which catalyzes the conversion of thiocyanate (SCN-) into antimicrobial agent hypothiocyanous acid (OSCN-) in the presence of hydrogen peroxide (H<sub>2</sub>O<sub>2</sub>).</p> <p>Also involved in the conversion of iodide (I-) into hypoiodite (IO-) in the presence of H<sub>2</sub>O<sub>2</sub>.</p> <p>Responsible for the inactivation of a wide range of micro-organisms and hence, important component of defense mechanism.</p> <p>Shows antibacterial properties against <i>Pseudomonas aeruginosa</i>.</p> <p>The lactoperoxidase-SCN- H<sub>2</sub>O<sub>2</sub> system shows antibacterial properties against <i>Burkholderia cepacia</i> and <i>Haemophilus influenzae</i> in vitro.</p> <p>Present in mammary and salivary gland secretions and may contribute to airway host defense against infection.</p> <p>May contribute to maintaining an appropriate H<sub>2</sub>O<sub>2</sub> cellular level, therefore protecting cells from H<sub>2</sub>O<sub>2</sub>-caused injuries and inflammation.</p> | <ul style="list-style-type: none"> <li>having antimicrobial activity and presumably contributing to the protective functions of milk</li> </ul> | ++                                  | ++              | +              | ++    | ++          |

|                                   |                                        |                                                                                                                                                                                                                                                                                                                                                                                                                                                                                       |                                                                                                                                                                                                                                                                                                                                                                                                                                                                                                                                                                                                                                                                                                                                                                                                                                                                                                                                                                                                                                                                                                                                                                                                                                                                                                                                                                                                                                                                                                                                                                                                                         |   |   |     |     |   |
|-----------------------------------|----------------------------------------|---------------------------------------------------------------------------------------------------------------------------------------------------------------------------------------------------------------------------------------------------------------------------------------------------------------------------------------------------------------------------------------------------------------------------------------------------------------------------------------|-------------------------------------------------------------------------------------------------------------------------------------------------------------------------------------------------------------------------------------------------------------------------------------------------------------------------------------------------------------------------------------------------------------------------------------------------------------------------------------------------------------------------------------------------------------------------------------------------------------------------------------------------------------------------------------------------------------------------------------------------------------------------------------------------------------------------------------------------------------------------------------------------------------------------------------------------------------------------------------------------------------------------------------------------------------------------------------------------------------------------------------------------------------------------------------------------------------------------------------------------------------------------------------------------------------------------------------------------------------------------------------------------------------------------------------------------------------------------------------------------------------------------------------------------------------------------------------------------------------------------|---|---|-----|-----|---|
| <i>DHCR24</i><br>(1718)<br>1p32.3 | 24-<br>dehydrocholesterol<br>reductase | <p>Catalyzes the reduction of the delta-24 double bond of sterol intermediates during cholesterol biosynthesis. In addition to its cholesterol-synthesizing activity, can protect cells from oxidative stress by reducing caspase 3 activity during apoptosis induced by oxidative stress. Also protects against amyloid-beta peptide-induced apoptosis. Catalytic Activity<br/> <math>\text{cholesterol} + \text{NADP}^+ = \text{desmosterol} + \text{H}^+ + \text{NADPH}</math></p> | <ul style="list-style-type: none"> <li>• catalyzing the reduction of the delta-24 double bond of sterol intermediates during cholesterol biosynthesis</li> <li>• acting as an antiapoptotic factor in neurons</li> <li>• playing a role in protection of cells against amyloid beta peptide toxicity and oxidative stress</li> <li>• might be involved in the molecular events of adrenocortical tumorigenesis by facilitating steroid synthesis and cell growth</li> <li>• being a key mediator of Ras-induced senescence</li> <li>• regulates responses to oncogenic and oxidative stimuli</li> <li>• flavin adenine dinucleotide-dependent oxidoreductase regulating responses to oncogenic and oxidative stimuli</li> <li>• playing a role in cholesterol biosynthesis, APP processing and Abeta generation</li> <li>• exerts an anti-apoptotic function as a reactive oxygen species (ROS) scavenger, for which it needs its FAD-binding domain</li> <li>• anti-apoptotic function of DHCR24 is likely associated with its cleavage by caspase</li> <li>• involved in cell growth, senescence and cellular response to oncogenic and oxidative stress</li> <li>• endoplasmic reticulum (ER)-localized multifunctional enzyme that possesses anti-apoptotic and cholesterol-synthesizing activities</li> <li>• could protect neuronal cells from apoptosis induced by ER stress</li> <li>• DHCR24 associates strongly with the endoplasmic reticulum beyond predicted membrane domains: implications for the activities of this multi-functional enzyme</li> <li>• converts desmosterol into cholesterol</li> </ul> | + | + | +++ | +++ | + |
|-----------------------------------|----------------------------------------|---------------------------------------------------------------------------------------------------------------------------------------------------------------------------------------------------------------------------------------------------------------------------------------------------------------------------------------------------------------------------------------------------------------------------------------------------------------------------------------|-------------------------------------------------------------------------------------------------------------------------------------------------------------------------------------------------------------------------------------------------------------------------------------------------------------------------------------------------------------------------------------------------------------------------------------------------------------------------------------------------------------------------------------------------------------------------------------------------------------------------------------------------------------------------------------------------------------------------------------------------------------------------------------------------------------------------------------------------------------------------------------------------------------------------------------------------------------------------------------------------------------------------------------------------------------------------------------------------------------------------------------------------------------------------------------------------------------------------------------------------------------------------------------------------------------------------------------------------------------------------------------------------------------------------------------------------------------------------------------------------------------------------------------------------------------------------------------------------------------------------|---|---|-----|-----|---|

|                                             |                  |                                                                                                                                                                                                                                                                                                                                                                                                                                                                                                                                                                                                                                                                                                                                                                                                                                                                                                                                                                                                                                                                                                                                                                                                                                                                                                                                                                                                                                                                                                                                       |                                                                                                                                                                                                                                                                                                                                                                                                                                                                                                                                                                                                                                                                                                                                                                                                                                                                                                                                                                                                                                                                                                                                                                                                                                                                                                                                                                                                                                                                                                                                                                                                                                                                                 |          |           |          |           |          |
|---------------------------------------------|------------------|---------------------------------------------------------------------------------------------------------------------------------------------------------------------------------------------------------------------------------------------------------------------------------------------------------------------------------------------------------------------------------------------------------------------------------------------------------------------------------------------------------------------------------------------------------------------------------------------------------------------------------------------------------------------------------------------------------------------------------------------------------------------------------------------------------------------------------------------------------------------------------------------------------------------------------------------------------------------------------------------------------------------------------------------------------------------------------------------------------------------------------------------------------------------------------------------------------------------------------------------------------------------------------------------------------------------------------------------------------------------------------------------------------------------------------------------------------------------------------------------------------------------------------------|---------------------------------------------------------------------------------------------------------------------------------------------------------------------------------------------------------------------------------------------------------------------------------------------------------------------------------------------------------------------------------------------------------------------------------------------------------------------------------------------------------------------------------------------------------------------------------------------------------------------------------------------------------------------------------------------------------------------------------------------------------------------------------------------------------------------------------------------------------------------------------------------------------------------------------------------------------------------------------------------------------------------------------------------------------------------------------------------------------------------------------------------------------------------------------------------------------------------------------------------------------------------------------------------------------------------------------------------------------------------------------------------------------------------------------------------------------------------------------------------------------------------------------------------------------------------------------------------------------------------------------------------------------------------------------|----------|-----------|----------|-----------|----------|
| <p><i>SIRT2</i><br/>(22933)<br/>19q13.2</p> | <p>sirtuin 2</p> | <p>NAD-dependent protein deacetylase, which deacetylates internal lysines on histone and alpha-tubulin as well as many other proteins such as key transcription factors.</p> <p>Participates in the modulation of multiple and diverse biological processes such as cell cycle control, genomic integrity, microtubule dynamics, cell differentiation, metabolic networks, and autophagy.</p> <p>Plays a major role in the control of cell cycle progression and genomic stability.</p> <p>Functions in the antephase checkpoint preventing precocious mitotic entry in response to microtubule stress agents, and hence allowing proper inheritance of chromosomes.</p> <p>Positively regulates the anaphase promoting complex/cyclosome (APC/C) ubiquitin ligase complex activity by deacetylating CDC20 and FZR1, then allowing progression through mitosis.</p> <p>Associates both with chromatin at transcriptional start sites (TSSs) and enhancers of active genes.</p> <p>Plays a role in cell cycle and chromatin compaction through epigenetic modulation of the regulation of histone H4 'Lys-20' methylation (H4K20me1) during early mitosis. Specifically deacetylates histone H4 at 'Lys-16' (H4K16ac) between the G2/M transition and metaphase enabling H4K20me1 deposition by KMT5A leading to ulterior levels of H4K20me2 and H4K20me3 deposition throughout cell cycle, and mitotic S-phase progression.</p> <p>Deacetylates KMT5A modulating KMT5A chromatin localization during the mitotic stress response.</p> | <ul style="list-style-type: none"> <li>• conserved NAD<sup>+</sup>-dependent deacetylases and ADP-ribosyltransferases involved in the regulation of cell division, apoptosis, DNA damage repair, genomic silencing, and longevity</li> <li>• deacetylating the Lys-40 of alpha-tubulin (role in the cell cycle regulation)</li> <li>• involved in the control of mitotic exit in the cell cycle, probably via its role in the regulation of cytoskeleton</li> <li>• involved in chromatin structure</li> <li>• involved in control of cellular life span</li> <li>• involved in mitotic progression in the normal cell cycle</li> <li>• mitotic checkpoint protein that functions in the early metaphase to prevent chromosomal instability</li> <li>• acts as an important regulator of adipocyte differentiation through modulation of FOXO1 acetylation/phosphorylation and activity and may play a role in controlling adipose tissue mass and function</li> <li>• responds to nutrient deprivation and energy expenditure to maintain energy homeostasis by promoting lipolysis and inhibiting adipocyte differentiation</li> <li>• deacetylase for tubulin and histone H4</li> <li>• function of SIRT2 for centrosome maintenance upon exposure to mitotic stress caused by microtubule inhibitors, but also the existence of a centrosome-mediated signaling pathway to sustain the spindle checkpoint</li> <li>• by participating in the stress response to genomic insults, sirtuins are thought to protect against cancer, but they are also emerging as direct participants in the growth of some cancers</li> <li>• tubulin deacetylase and an important</li> </ul> | <p>+</p> | <p>++</p> | <p>+</p> | <p>++</p> | <p>+</p> |
|---------------------------------------------|------------------|---------------------------------------------------------------------------------------------------------------------------------------------------------------------------------------------------------------------------------------------------------------------------------------------------------------------------------------------------------------------------------------------------------------------------------------------------------------------------------------------------------------------------------------------------------------------------------------------------------------------------------------------------------------------------------------------------------------------------------------------------------------------------------------------------------------------------------------------------------------------------------------------------------------------------------------------------------------------------------------------------------------------------------------------------------------------------------------------------------------------------------------------------------------------------------------------------------------------------------------------------------------------------------------------------------------------------------------------------------------------------------------------------------------------------------------------------------------------------------------------------------------------------------------|---------------------------------------------------------------------------------------------------------------------------------------------------------------------------------------------------------------------------------------------------------------------------------------------------------------------------------------------------------------------------------------------------------------------------------------------------------------------------------------------------------------------------------------------------------------------------------------------------------------------------------------------------------------------------------------------------------------------------------------------------------------------------------------------------------------------------------------------------------------------------------------------------------------------------------------------------------------------------------------------------------------------------------------------------------------------------------------------------------------------------------------------------------------------------------------------------------------------------------------------------------------------------------------------------------------------------------------------------------------------------------------------------------------------------------------------------------------------------------------------------------------------------------------------------------------------------------------------------------------------------------------------------------------------------------|----------|-----------|----------|-----------|----------|

---

Deacetylates also histone H3 at 'Lys-57' (H3K56ac) during the mitotic G2/M transition. Upon bacterium *Listeria monocytogenes* infection, deacetylates 'Lys-18' of histone H3 in a receptor tyrosine kinase MET- and PI3K/Akt-dependent manner, thereby inhibiting transcriptional activity and promoting late stages of listeria infection.

During oocyte meiosis progression, may deacetylate histone H4 at 'Lys-16' (H4K16ac) and alpha-tubulin, regulating spindle assembly and chromosome alignment by influencing microtubule dynamics and kinetochore function.

Deacetylates histone H4 at 'Lys-16' (H4K16ac) at the *VEGFA* promoter and thereby contributes to regulate expression of *VEGFA*, a key regulator of angiogenesis.

Deacetylates alpha-tubulin at 'Lys-40' and hence controls neuronal motility, oligodendroglial cell arbor projection processes and proliferation of non-neuronal cells.

Phosphorylation at Ser-368 by a G1/S-specific cyclin E-CDK2 complex inactivates SIRT2-mediated alpha-tubulin deacetylation, negatively regulating cell adhesion, cell migration and neurite outgrowth during neuronal differentiation.

Deacetylates PARD3 and participates in the regulation of Schwann cell peripheral myelination formation during early postnatal development and during postinjury remyelination.

Involved in several cellular metabolic pathways.

Plays a role in the regulation of blood glucose homeostasis by deacetylating and stabilizing

regulator of cell division and myelinogenesis  
• having an unique role in the control of neuronal metabolism

• in non-neuronal cells, function as a tubulin deacetylase and a key regulator of cell division and differentiation

• role in regulating microtubule acetylation patterns in neurons, suggesting a novel mechanism by which neuronal function might become impaired in the aging brain

• NAD-dependent deacetylase that is an important regulator of programmed necrosis and inhibitors of this deacetylase may constitute a novel approach to protect against necrotic injuries, including ischaemic stroke and myocardial infarction

• regulation of protein acetylation by SIRT2 plays a central role in platelet function

• SIRT1 and SIRT2 are NAD(+)-dependent histone deacetylases that operate as post-translational regulators for the deacetylation of acetyllysine

• function of SIRT2 extends beyond the regulation of microtubules to include the regulation of nuclear envelope dynamics

• cytoplasmic sirtuin that plays a role in various cellular processes, including tumorigenesis, metabolism, and inflammation

• link between SIRT2 and physiological aging impacting the axonal compartment of the central nervous system, while supporting a major role for SIRT2 in orchestrating its metabolic regulation

• inhibits cell motility by suppressing actin polymerization

• SIRT2 plays a critical role in mediating the radiation-induced DNA damage response, thus regulating radiation-induced cell death

---

---

phosphoenolpyruvate carboxykinase PCK1 activity in response to low nutrient availability.

Acts as a key regulator in the pentose phosphate pathway (PPP) by deacetylating and activating the glucose-6-phosphate G6PD enzyme, and therefore, stimulates the production of cytosolic NADPH to counteract oxidative damage.

Maintains energy homeostasis in response to nutrient deprivation as well as energy expenditure by inhibiting adipogenesis and promoting lipolysis.

Attenuates adipocyte differentiation by deacetylating and promoting FOXO1 interaction to PPAR $\gamma$  and subsequent repression of PPAR $\gamma$ -dependent transcriptional activity.

Plays a role in the regulation of lysosome-mediated degradation of protein aggregates by autophagy in neuronal cells.

Deacetylates FOXO1 in response to oxidative stress or serum deprivation, thereby negatively regulating FOXO1-mediated autophagy.

Deacetylates a broad range of transcription factors and co-regulators regulating target gene expression. Deacetylates transcriptional factor FOXO3 stimulating the ubiquitin ligase SCF(SKP2)-mediated FOXO3 ubiquitination and degradation (By similarity).

Deacetylates HIF1A and therefore promotes HIF1A degradation and inhibition of HIF1A transcriptional activity in tumor cells in response to hypoxia.

Deacetylates RELA in the cytoplasm inhibiting NF-kappaB-dependent transcription activation upon TNF-alpha stimulation.

and survival

- plays an important role in the response to stress, thereby modulating depression-like behaviors
  - NAD-dependent sirtuin deacetylase that regulates microtubule and chromatin dynamics, gene expression, cell cycle progression as well as nuclear envelope reassembly
  - SIRT2 may also play a role in Golgi structure formation
-

|                             |                                        |                                                                                                                                                                                                                                                                                                                                                                                                                                                                                                                                                                                                                                                                                                                                                                         |                                                                                                                                                                                                                                                                                                                                                                 |    |    |    |    |    |  |
|-----------------------------|----------------------------------------|-------------------------------------------------------------------------------------------------------------------------------------------------------------------------------------------------------------------------------------------------------------------------------------------------------------------------------------------------------------------------------------------------------------------------------------------------------------------------------------------------------------------------------------------------------------------------------------------------------------------------------------------------------------------------------------------------------------------------------------------------------------------------|-----------------------------------------------------------------------------------------------------------------------------------------------------------------------------------------------------------------------------------------------------------------------------------------------------------------------------------------------------------------|----|----|----|----|----|--|
|                             |                                        | <p>Inhibits transcriptional activation by deacetylating p53/TP53 and EP300.</p> <p>Deacetylates also EIF5A.</p> <p>Functions as a negative regulator on oxidative stress-tolerance in response to anoxia-reoxygenation conditions.</p> <p>Plays a role as tumor suppressor.</p> <p>In addition to protein deacetylase activity, also has activity toward long-chain fatty acyl groups and mediates protein-lysine demyristoylation and depalmitoylation of target proteins, such as ARF6 and KRAS, thereby regulating their association with membranes. Catalytic Activity</p> <p><math>\text{H}_2\text{O}_2 + \text{N}^6\text{-acetyl-L-lysyl-[protein]} + \text{NAD}^+ = 2''\text{-O-acetyl-ADP-D-ribose} + \text{L-lysyl-[protein]} + \text{nicotinamide}</math></p> |                                                                                                                                                                                                                                                                                                                                                                 |    |    |    |    |    |  |
| SCARA3<br>(51435)<br>8p21.1 | scavenger receptor<br>class A member 3 | Seems to protect cells by scavenging oxidative molecules or harmful products of oxidation.                                                                                                                                                                                                                                                                                                                                                                                                                                                                                                                                                                                                                                                                              | <ul style="list-style-type: none"><li>• may be a potent tumor sup-pressor gene</li><li>• undergoes hypermethylation in over 30 p100 of prostate cancers</li><li>• probably has a role beyond a cell stress-response gene</li><li>• induce cell death through a novel mechanism by hijacking a critical RNA processing enzyme</li></ul>                          | ++ | ++ | ++ | ++ | +  |  |
| SRXN1<br>(140809)<br>20p13  | sulfiredoxin 1                         | <p>Contributes to oxidative stress resistance by reducing cysteine-sulfinic acid formed under exposure to oxidants in the peroxiredoxins PRDX1, PRDX2, PRDX3 and PRDX4.</p> <p>Does not act on PRDX5 or PRDX6.</p> <p>May catalyze the reduction in a multi-step process by acting both as a specific phosphotransferase and a thioltransferase.</p>                                                                                                                                                                                                                                                                                                                                                                                                                    | <ul style="list-style-type: none"><li>• catalyzes a novel enzymatic reaction, the reduction of protein cysteine sulfinic acid, Cys-SO(2)(-)</li><li>• deglutathionylation function of sulfiredoxin suggesting a central role in redox control with potential implications in cell signaling</li><li>• role in the feedback regulation of AP1 activity</li></ul> | +  | ++ | ++ | +  | ++ |  |
| RAC1<br>(5879)<br>7p22.1    | Rac family small<br>GTPase 1           | Plasma membrane-associated small GTPase which cycles between active GTP-bound and inactive GDP-bound states. In its active state, binds to a variety of effector proteins to regulate cellular responses such as secretory processes, phagocytosis of apoptotic cells,                                                                                                                                                                                                                                                                                                                                                                                                                                                                                                  | <ul style="list-style-type: none"><li>• playing a significant role in the bone resorptive activity of cells, probably by regulating the motility of osteoclasts</li><li>• has a known role in cerebellar development</li><li>• potent activator of mineralocorticoid receptor signal transduction</li></ul>                                                     | ++ | +  | +  | +  | ++ |  |



---

epithelial cell polarization, neurons adhesion, migration and differentiation, and growth-factor induced formation of membrane ruffles. Rac1 p21/rho GDI heterodimer is the active component of the cytosolic factor sigma 1, which is involved in stimulation of the NADPH oxidase activity in macrophages. Essential for the SPATA13-mediated regulation of cell migration and adhesion assembly and disassembly. Stimulates PKN2 kinase activity.

In concert with RAB7A, plays a role in regulating the formation of RBs (ruffled borders) in osteoclasts.

In podocytes, promotes nuclear shuttling of NR3C2; this modulation is required for a proper kidney functioning. Required for atypical chemokine receptor ACKR2-induced LIMK1-PAK1-dependent phosphorylation of cofilin (CFL1) and for up-regulation of ACKR2 from endosomal compartment to cell membrane, increasing its efficiency in chemokine uptake and degradation. In neurons, is involved in dendritic spine formation and synaptic plasticity.

In hippocampal neurons, involved in spine morphogenesis and synapse formation, through local activation at synapses by guanine nucleotide exchange factors (GEFs), such as ARHGEF6/ARHGEF7/PIX.

In synapses, seems to mediate the regulation of F-actin cluster formation performed by SHANK3. In neurons, plays a crucial role in regulating GABA(A) receptor synaptic stability and hence GABAergic inhibitory synaptic transmission through its role in PAK1 activation and eventually F-actin stabilization.

- involved in the production of superoxide in neutrophils
  - putative regulator of mitogen-induced cytoskeletal changes essential for membrane ruffling and C-jun aminoterminal kinase JNK
  - regulator of actin filament at the plasma membrane to produce lamellipodia and membrane ruffles, controlling proliferation, adhesion, migration during embryonic development
  - key downstream target in Ras signaling
  - linking growth factor receptor to the activator of actin polymerization
  - activating JNK signaling pathway
  - reduction of oxygen to O<sup>-2</sup> at the expense of NADPH, the O<sup>-2</sup>-generated is the precursor of potent oxidants used to kill the invading microorganisms
  - exerting its effects in the epidermis by negatively regulating c-Myc through p21-activated kinase 2 (PAK2) phosphorylation
  - may playing an important role in corneal wound healing
  - have distinct roles in regulating cell morphology, migration and invasion, but are not essential for macrophage migration or chemotaxis
  - critically involved in M-CSF receptor signaling and mediates survival signaling primarily through PI3K/Akt pathways
  - regulating cell adhesion, migration and differentiation in various cell types
  - role in hematopoietic development and function
  - critical role in B cell development and signaling
  - controls the formation of dendrites in mature dendritic cells, their polarized short-range
-

- 
- migration toward T cells, and T cell priming
  - critical for the hypertrophic response in the heart
  - negatively controls LPS-induced IL-23 p19 expression through an NF-kappaB p65 trans activation-dependent
  - mediator of colony-stimulating factor 1 (CSF-1)-dependent actin remodeling in osteoclasts
  - central role for Rac1 in the control of NDRG1-induced breast cancer cell-cycle progression and proliferation through up-regulating the expression of cyclin D1 and CDKN1A
  - essential player for mediating the induction of cyclin D1 and CDKN1A by HRG in breast cancer cells
  - involved in endothelial cell cytoskeletal reorganization and in neovessel formation
  - shares with RAC3 the ability to interfere with cadherin-mediated adhesion
  - both RAC1 and RAC3 are important for the development of the nervous system, wherein they play complementary roles during late stages of neuronal and brain development
  - its overexpression contributes to the accelerated migration and high proliferation potential of leukemia cells, which could be implicated in leukemia development and progression
  - with RHOA, and RHOB, are involved in the establishment of the migratory and invasive phenotype of tumour cells that have CDH1 mutation
  - play essential roles in coordinating directional migration and superoxide production during neutrophil responses to chemoattractants
  - RAC1 and RAC2 GTPases are essential for normal bone marrow erythropoiesis but that they are dispensable for erythropoiesis in the
-

spleen, implying different signaling pathways for homeostatic and stress erythropoiesis

- critical regulator of both MTOR and CRTC2 in response to growth-factor stimulation
- role for neuronal RAC1 and RAC3 in dictating proper lymphoid organ development, suggesting the existence of lymphoid-extrinsic mechanisms linking neural defects to the loss of immune-competence
- RAC1 and RAC3 GTPases participate in the normal development of hilar mossy cells, and indicate that they are involved in the regulation of the migration of the mossy cell precursor by preventing their arrival to the dorsal hilus
- cell-autonomous and stage-specific functions for the small Rho GTPases CDC42 and RAC1 in the course of adult hippocampal neurogenesis
- RAC1 and CDC42 are molecular switches that control many cellular processes, but are best known for their roles in the regulation of actin cytoskeleton dynamics
- divergent roles of RAC1 and CDC42 function in podocyte maintenance and injury
- FHOD1 and the small GTPase RAC1 promote vaccinia virus actin-based motility
- RAC1 has been reported to function downstream of ARF6 to control membrane ruffling and cell migration
- RAC1 controls surface mobilization of CD40LG on activated platelets and MMP9 secretion from neutrophils
- RHOA and RAC1 function as master regulators of cytokinesis by controlling the actomyosin cytoskeleton
- importance of RAC1 in neuronal development
- involved in the production of superoxide in

|      |                  |                            |              |  |   |                                             |    |   |    |    |     |
|------|------------------|----------------------------|--------------|--|---|---------------------------------------------|----|---|----|----|-----|
| RAC2 | Rac family small | Plasma membrane-associated | small GTPase |  | • | involved in the production of superoxide in | ++ | + | ++ | ++ | +++ |
|------|------------------|----------------------------|--------------|--|---|---------------------------------------------|----|---|----|----|-----|

|                   |          |                                                                                                                                                                                                                                                                                                                                                 |                                                                                                                                                                                                                                                                                                                                                                                                                                                                                                                                                                                                                                                                                                                                                                                                                                                                                                                                                                                                                                                                                                                                                                                                                                                                                                                                                                                                                                                                                                                                                                                                                                                                                                                                                    |
|-------------------|----------|-------------------------------------------------------------------------------------------------------------------------------------------------------------------------------------------------------------------------------------------------------------------------------------------------------------------------------------------------|----------------------------------------------------------------------------------------------------------------------------------------------------------------------------------------------------------------------------------------------------------------------------------------------------------------------------------------------------------------------------------------------------------------------------------------------------------------------------------------------------------------------------------------------------------------------------------------------------------------------------------------------------------------------------------------------------------------------------------------------------------------------------------------------------------------------------------------------------------------------------------------------------------------------------------------------------------------------------------------------------------------------------------------------------------------------------------------------------------------------------------------------------------------------------------------------------------------------------------------------------------------------------------------------------------------------------------------------------------------------------------------------------------------------------------------------------------------------------------------------------------------------------------------------------------------------------------------------------------------------------------------------------------------------------------------------------------------------------------------------------|
| (5880)<br>22q13.1 | GTPase 2 | <p>which cycles between an active GTP-bound and inactive GDP-bound state. In active state binds to a variety of effector proteins to regulate cellular responses, such as secretory processes, phagocytosis of apoptotic cells and epithelial cell polarization. Augments the production of reactive oxygen species (ROS) by NADPH oxidase.</p> | <p>neutrophils</p> <ul style="list-style-type: none"> <li>• putative regulator of mitogen-induced cytoskeletal changes essential for membrane ruffling and C-jun aminoterminal kinase JNK</li> <li>• regulator of actin filament at the plasma membrane to produce lamellipodia and membrane ruffles</li> <li>• key downstream target in Ras signaling</li> <li>• linking growth factor receptor to the activator of actin polymerization</li> <li>• activating JNK signaling pathway</li> <li>• reduction of oxygen to O<sub>2</sub><sup>-</sup> at the expense of NADPH, the O<sub>2</sub><sup>-</sup> generated is the precursor of potent oxidants used to kill the invading microorganisms</li> <li>• have distinct roles in regulating cell morphology, migration and invasion, but are not essential for macrophage migration or chemotaxis</li> <li>• plays a critical role in host defense</li> <li>• plays an important role in cell migration with activation of membrane ruffling, whereas the other members of the Rho family, like RHOA and CDC42, mediate stress fibers and filopodia formation, respectively</li> <li>• in hematopoietic cells regulates leukocyte lineage distribution and in nonhematopoietic cells might contribute to regulating circulating neutrophil counts</li> <li>• play essential roles in coordinating directional migration and superoxide production during neutrophil responses to chemoattractants</li> <li>• RAC1 and RAC2 GTPases are essential for normal bone marrow erythropoiesis but that they are dispensable for erythropoiesis in the spleen, implying different signaling pathways for homeostatic and stress erythropoiesis</li> <li>• important role in mature osteoclasts</li> </ul> |
|-------------------|----------|-------------------------------------------------------------------------------------------------------------------------------------------------------------------------------------------------------------------------------------------------------------------------------------------------------------------------------------------------|----------------------------------------------------------------------------------------------------------------------------------------------------------------------------------------------------------------------------------------------------------------------------------------------------------------------------------------------------------------------------------------------------------------------------------------------------------------------------------------------------------------------------------------------------------------------------------------------------------------------------------------------------------------------------------------------------------------------------------------------------------------------------------------------------------------------------------------------------------------------------------------------------------------------------------------------------------------------------------------------------------------------------------------------------------------------------------------------------------------------------------------------------------------------------------------------------------------------------------------------------------------------------------------------------------------------------------------------------------------------------------------------------------------------------------------------------------------------------------------------------------------------------------------------------------------------------------------------------------------------------------------------------------------------------------------------------------------------------------------------------|



- 
- plays a fundamental role in conferring macrophages with the ability to respond to extracellular ATP stimulation with robust changes in cellular oxidation
  - plays an important role in the control of afferent arteriole tone and is involved in the contractile responses to ANGPT2 and/or adenosine
  - plays a key role in apoptosis and phagocytosis of hepatocytes inducing activation of hepatic stellate cells and initiation of fibrosis in liver
  - role in the activation of autophagy, a cellular degradative pathway
  - mediating proliferative response in endothelial cells
  - reactive oxygen species generated by NADPH oxidase 2 and 4 (CYBB and NOX4) are required for chondrogenic differentiation
  - implicated as a source of rapid stretch-dependent ROS production at the junctional sarcoplasmic reticulum of cardiomyocytes (X-ROS signaling)
  - plays a role in neuronal cell death during retinal ischemia
  - is a key mediator of insulin resistance in skeletal muscle
  - from both hematopoietic and endothelial cells CYBB is crucial for neutrophil-platelet interactions during TNF-induced venular inflammation
  - is critical for heterotypic neutrophil-platelet interactions during vascular inflammation
  - NOX1 and CYBB play differential roles in different platelet activation pathways and in thrombosis
  - is a critical component of the suppressive machinery of CD8 Tregs, suggesting that repairing CYBB deficiency in these cells may
-



|                            |                               |                                                                                                                                                                                                                                                                                                                              |                                                                                                                                                                                                                                                                                                                                                                                                                                                                                                                                                                                                                                                                                                                                                                                                                             |    |    |   |    |         |  |  |
|----------------------------|-------------------------------|------------------------------------------------------------------------------------------------------------------------------------------------------------------------------------------------------------------------------------------------------------------------------------------------------------------------------|-----------------------------------------------------------------------------------------------------------------------------------------------------------------------------------------------------------------------------------------------------------------------------------------------------------------------------------------------------------------------------------------------------------------------------------------------------------------------------------------------------------------------------------------------------------------------------------------------------------------------------------------------------------------------------------------------------------------------------------------------------------------------------------------------------------------------------|----|----|---|----|---------|--|--|
|                            |                               |                                                                                                                                                                                                                                                                                                                              | <ul style="list-style-type: none"> <li>potent oxidants used to kill the invading microorganisms</li> <li>being a membrane bound cytochrome b558 required for activation of the latent NADPH oxidase</li> <li>essential component of the multi-protein NADPH oxidase enzyme in phagocytic leukocytes, as well as in certain non-phagocytic cells</li> </ul>                                                                                                                                                                                                                                                                                                                                                                                                                                                                  |    |    |   |    |         |  |  |
| NCF4<br>(4689)<br>22q13.1  | neutrophil cytosolic factor 4 | Component of the NADPH-oxidase, a multicomponent enzyme system responsible for the oxidative burst in which electrons are transported from NADPH to molecular oxygen, generating reactive oxidant intermediates. It may be important for the assembly and/or activation of the NADPH-oxidase complex.                        | <ul style="list-style-type: none"> <li>activating the NADPH oxidase during FcγRIIA receptor-induced phagocytosis</li> <li>reduction of oxygen to O<sub>2</sub> at the expense of NADPH, the O<sub>2</sub>-generated is the precursor of potent oxidants used to kill the invading microorganisms</li> <li>negatively regulating the NADPH oxidase upon phosphorylation</li> </ul>                                                                                                                                                                                                                                                                                                                                                                                                                                           | ++ | ++ | + | ++ | +++     |  |  |
| NOXA1<br>(10811)<br>9q34.3 | NADPH oxidase activator 1     | Functions as an activator of NOX1, a superoxide-producing NADPH oxidase. Functions in the production of reactive oxygen species (ROS) which participate in a variety of biological processes including host defense, hormone biosynthesis, oxygen sensing and signal transduction. May also activate CYBB/gp91phox and NOX3. | <ul style="list-style-type: none"> <li>participating in activation of superoxide-producing NADPH oxidases</li> <li>mediating the binding of other regulatory proteins during activation of the phagocyte oxidase, and its translocation to the membrane is triggered upon cell activation by hyperphosphorylation</li> <li>acts in conjunction with Nox organizer 1 (NOXO1) to regulate reactive oxygen species (ROS) production by the NADPH oxidase NOX1</li> <li>likely a key player that links oxidized low-density lipoprotein with the activation of endothelial NAD(P)H oxidase</li> <li>with NOXO1, having a role, as well as the binding of Rac1 GTPase, for NOX1 activity</li> <li>functional homolog of NCF2 in VSMCs (vascular smooth muscle cell) that regulates redox signaling and VSMC phenotype</li> </ul> |    |    |   |    | No data |  |  |
| NOXO1<br>(124056)          | NADPH oxidase organizer 1     | Constitutively potentiates the superoxide-generating activity of NOX1 and NOX3 and is                                                                                                                                                                                                                                        | <ul style="list-style-type: none"> <li>involved in intracellular signaling cascade activating NOX1</li> </ul>                                                                                                                                                                                                                                                                                                                                                                                                                                                                                                                                                                                                                                                                                                               |    |    |   |    | No data |  |  |



|                           |                 |                                                                                                                                                                                                                                                                                                                                                                                                                 |                                                                                                                                                                                                                                                                                                                                                                                                                                                                                                                                                                                                                                                                                                                                                                                                                                                                                                                                                                                                                                                                                                                                                                                        |    |    |   |    |    |  |  |
|---------------------------|-----------------|-----------------------------------------------------------------------------------------------------------------------------------------------------------------------------------------------------------------------------------------------------------------------------------------------------------------------------------------------------------------------------------------------------------------|----------------------------------------------------------------------------------------------------------------------------------------------------------------------------------------------------------------------------------------------------------------------------------------------------------------------------------------------------------------------------------------------------------------------------------------------------------------------------------------------------------------------------------------------------------------------------------------------------------------------------------------------------------------------------------------------------------------------------------------------------------------------------------------------------------------------------------------------------------------------------------------------------------------------------------------------------------------------------------------------------------------------------------------------------------------------------------------------------------------------------------------------------------------------------------------|----|----|---|----|----|--|--|
| 16p13.3                   |                 | required for the biogenesis of otoconia/otolith, which are crystalline structures of the inner ear involved in the perception of gravity. Isoform 3 is more potent than isoform 1 in activating NOX3. Together with NOXA1, may also substitute to NCF1/p47phox and NCF2/p67phox in supporting the phagocyte NOX2/gp91phox superoxide-generating activity.                                                       | <ul style="list-style-type: none"><li>• binding to membrane lipids through its PX domain</li><li>• with NOXA1, having a role, as well as the binding of Rac1 GTPase, for NOX1 activity</li></ul>                                                                                                                                                                                                                                                                                                                                                                                                                                                                                                                                                                                                                                                                                                                                                                                                                                                                                                                                                                                       |    |    |   |    |    |  |  |
| NOX1<br>(27035)<br>Xq22.1 | NADPH oxidase 1 | NOH-1S is a voltage-gated proton channel that mediates the H+ currents of resting phagocytes and other tissues. It participates in the regulation of cellular pH and is blocked by zinc. NOH-1L is a pyridine nucleotide-dependent oxidoreductase that generates superoxide and might conduct H+ ions as part of its electron transport mechanism, whereas NOH-1S does not contain an electron transport chain. | <ul style="list-style-type: none"><li>• involved in growth control in non phagocytic cells</li><li>• pyridine nucleotide dependent superoxide generating</li><li>• acting as a voltage gated proton (H+) channel</li><li>• playing a crucial role in irradiation-induced ROS generation and ROS-associated impairment of salivary gland cells</li><li>• NOX1 mRNA and protein are overexpressed in colon cancer and are strongly correlated with activating mutations in K-Ras</li><li>• mediates oncogenic Ras-induced upregulation of VEGF and angiogenesis by activating Sp1 through Ras-ERK-dependent phosphorylation of Sp1</li><li>• controls the persistence of directed cell migration by a Rho-dependent switch of alpha2/alpha3 integrins</li><li>• mediating role of NOX1-generated reactive oxygen species in cell invasion processes, most notably metalloprotease production and cell motile activity</li><li>• involved in TP53 deacetylation and its activation may activate SIRT1 and inhibit TP53</li><li>• controls the balance between goblet and absorptive cell types in the colon by coordinately modulating PI3K/AKT/WNT/CTNNB1 and NOTCH1 signaling</li></ul> | ++ | ++ | + | ++ | ++ |  |  |



|                 |                 |                                                                                                                                                                                    |                                                                                                                                                                                                                                                                                                                                                                                                                                                                                                                                                                                                                                                                                                                                                                                                                                                                                                                                                                                                                                                                                                                                                                                                                                                                                                                                                                                                                                                                                                                                                                                   |    |    |    |    |    |    |   |
|-----------------|-----------------|------------------------------------------------------------------------------------------------------------------------------------------------------------------------------------|-----------------------------------------------------------------------------------------------------------------------------------------------------------------------------------------------------------------------------------------------------------------------------------------------------------------------------------------------------------------------------------------------------------------------------------------------------------------------------------------------------------------------------------------------------------------------------------------------------------------------------------------------------------------------------------------------------------------------------------------------------------------------------------------------------------------------------------------------------------------------------------------------------------------------------------------------------------------------------------------------------------------------------------------------------------------------------------------------------------------------------------------------------------------------------------------------------------------------------------------------------------------------------------------------------------------------------------------------------------------------------------------------------------------------------------------------------------------------------------------------------------------------------------------------------------------------------------|----|----|----|----|----|----|---|
|                 |                 | Modulates the nuclear activation of ERK1/2 and the ELK1 transcription factor, and is capable of inducing nuclear DNA damage. Displays an increased activity relative to isoform 1. | <ul style="list-style-type: none"> <li>• in cardiac myocytes is potentially a major source of mitochondrial oxidative stress, thereby mediating mitochondrial and cardiac dysfunction during pressure overload</li> <li>• with DUOX2, are required for platelet-derived growth factor (PDGF) induced RB1 phosphorylation in normal fibroblasts</li> <li>• NOX4 and DUOX2 regulate cell cycle entry as part of a p53-dependent checkpoint for proliferation</li> <li>• reactive oxygen species generated by NADPH oxidase 2 and 4 (CYBB and NOX4) are required for chondrogenic differentiation</li> <li>• unique inducible regulator of myocardial angiogenesis, a key determinant of cardiac adaptation to overload stress</li> <li>• unique stress-inducible regulator of myocardial angiogenesis that facilitates adaptation to cardiac overload stress</li> <li>• might be involved in the pathophysiology of lung artery hypertrophy in idiopathic pulmonary fibrosis</li> <li>• acts as an intermediary in the signaling of TGFB1 to facilitate collagen synthesis</li> <li>• is involved in the local stimulatory effects of TGFB1 on collagen accumulation</li> <li>• central role of NOX4 as a mediator of renal cell injury in diabetic kidney disease</li> <li>• expression of NLRP5 and NOX4 proteins are closely related to the follicular development and ovulation with particular regard for ovarian aging</li> <li>• integrin engagement during cell attachment activates POLDIP2/NOX4 to oxidize actin, which modulates focal adhesion (FA) assembly</li> </ul> |    |    |    |    |    |    |   |
| NOX5<br>(79400) | NADPH oxidase 5 | Calcium-dependent NADPH oxidase that generates superoxide. Also functions as a                                                                                                     | <ul style="list-style-type: none"> <li>• play an important role in PDGF-induced JAK/STAT activation and human aortic</li> </ul>                                                                                                                                                                                                                                                                                                                                                                                                                                                                                                                                                                                                                                                                                                                                                                                                                                                                                                                                                                                                                                                                                                                                                                                                                                                                                                                                                                                                                                                   | ++ | ++ | ++ | ++ | ++ | ++ | + |

|                                    |                |                                                                                                                                                                                                                                                                                                                                                                                                                  |                                                                                                                                                                                                                                                                                                                                                                                                                                                                                                                                                                                                                                                                                                                                                                                                                                                                                                                                                                                                                                                                                                                                         |   |    |   |    |    |  |  |
|------------------------------------|----------------|------------------------------------------------------------------------------------------------------------------------------------------------------------------------------------------------------------------------------------------------------------------------------------------------------------------------------------------------------------------------------------------------------------------|-----------------------------------------------------------------------------------------------------------------------------------------------------------------------------------------------------------------------------------------------------------------------------------------------------------------------------------------------------------------------------------------------------------------------------------------------------------------------------------------------------------------------------------------------------------------------------------------------------------------------------------------------------------------------------------------------------------------------------------------------------------------------------------------------------------------------------------------------------------------------------------------------------------------------------------------------------------------------------------------------------------------------------------------------------------------------------------------------------------------------------------------|---|----|---|----|----|--|--|
| 15q23                              |                | calcium-dependent proton channel and may regulate redox-dependent processes in lymphocytes and spermatozoa. May play a role in cell growth and apoptosis. Isoform v2 and isoform v5 are involved in endothelial generation of reactive oxygen species (ROS), proliferation and angiogenesis and contribute to endothelial response to thrombin.                                                                  | <ul style="list-style-type: none"><li>smooth muscle cell (HASMC) proliferation</li><li>being functional, promoting endothelial ROS production, proliferation, and the formation of capillary-like structures and contributing to the endothelial response to thrombin</li><li>is the main source of superoxide and is implicated in human spermatozoa motility</li><li>role for NOX5-dependent ROS generation in human spermatozoa motility</li><li>is the predominant NOX family NADPH oxidase in human spermatozoa</li></ul>                                                                                                                                                                                                                                                                                                                                                                                                                                                                                                                                                                                                          |   |    |   |    |    |  |  |
| <i>DUOX1</i><br>(53905)<br>15q21.1 | dual oxidase 1 | Generates hydrogen peroxide which is required for the activity of thyroid peroxidase/TPO and lactoperoxidase/LPO. Plays a role in thyroid hormones synthesis and lactoperoxidase-mediated antimicrobial defense at the surface of mucosa. May have its own peroxidase activity through its N-terminal peroxidase-like domain. <sup>2</sup><br>Publications<br>Catalytic Activity<br>H+ + NADH + O2 = H2O2 + NAD+ | <ul style="list-style-type: none"><li>basic thyroid H2O2 generating system with DUOX2</li><li>involved in mucin induction</li><li>involved in innate airway host defense through enhanced production of H2O2 (Boots 2009)</li><li>both DUOX1 and DUOX2 play a critical role in the production of H2O2 in the thyroid gland, which is the limiting factor in thyroglobulin iodination and thyroxine synthesis</li><li>activation results in the activation of ERK1/2 and NF-KappaB pathways, ADAM17 activation, EGFR ligand shedding leading to amplified epithelial EGFR activation and IL-8 production</li><li>either has a unique function or must interact with other protein factors to express its catalytic activity</li><li>also involved in thyroid hormonogenesis</li><li>despite the high sequence similarity shared between DUOX1 and DUOX2, the two isoforms present distinct regulations, tissue expression and catalytic functions</li><li>plays an important role in innate airway epithelial responses to infection or injury</li><li>importance of DUOX1 in epithelial redox signaling through reversible S-</li></ul> | + | ++ | + | ++ | ++ |  |  |





---

PMN, MPO catalyzes the production of hypohalous acids, primarily hypochlorous acid in physiologic situations, and other toxic intermediates that greatly enhance PMN microbicidal activity.

Mediates the proteolytic cleavage of alpha-1-microglobulin to form t-alpha-1-microglobulin, which potently inhibits oxidation of low-density lipoprotein particles and limits vascular damage.

Catalytic Activity

$\text{chloride} + \text{H}^+ + \text{H}_2\text{O}_2 = \text{H}_2\text{O} + \text{hypochlorous acid}$

- implicated in atherosclerosis and cholesterol homeostasis
  - crucial prerequisite for structural remodeling of the myocardium, leading to an increased vulnerability to atrial fibrillation
  - acts as a major downstream mediator of atrial fibrosis and atrial arrhythmogeneity
  - intimately involved in the pathophysiology of atrial fibrillation
  - is required for neutrophil extracellular traps (NETs) formation
  - is involved in a multitude of inflammatory processes involving oxidative modification of soluble components and cellular surfaces
  - plays a key role in promoting atherosclerosis via oxidative stress by modification of both high- and low-density lipoprotein and production of other bioactive molecules
  - MPO is unique in its capacity to oxidize chloride at physiologic pH to produce hypochlorous acid (HOCl), a potent microbicide that contributes to neutrophil-mediated host defense against infection
  - MPO, via its catalytic activity, inhibits the generation of adaptive immunity by suppressing dendritic cells (DCs) activation, Ag uptake/processing, and migration to lymph nodes (LNs) to limit pathological tissue inflammation
  - abundant hemoprotein expressed by neutrophil granulocytes that is recognized to play an important role in the development of vascular diseases
  - uses hydrogen peroxide generated by the oxidative burst of neutrophils to produce an array of antimicrobial oxidants
  - has both potent microbicidal and, upon binding to the vessel wall, pro-inflammatory
-





|                         |               |                                                                                                                                                                                                                                                                                                                                                                                                                                                     |                                                                                                                                                                                                                                                                                                                                                                                                                                                                                                                                                                                                                                                                                                                                                                                                                                                                                                                                                                                                                                                                                                                                                                          |    |    |     |    |    |  |
|-------------------------|---------------|-----------------------------------------------------------------------------------------------------------------------------------------------------------------------------------------------------------------------------------------------------------------------------------------------------------------------------------------------------------------------------------------------------------------------------------------------------|--------------------------------------------------------------------------------------------------------------------------------------------------------------------------------------------------------------------------------------------------------------------------------------------------------------------------------------------------------------------------------------------------------------------------------------------------------------------------------------------------------------------------------------------------------------------------------------------------------------------------------------------------------------------------------------------------------------------------------------------------------------------------------------------------------------------------------------------------------------------------------------------------------------------------------------------------------------------------------------------------------------------------------------------------------------------------------------------------------------------------------------------------------------------------|----|----|-----|----|----|--|
| (7498)<br>2p23.1        | dehydrogenase | <p>the oxidation of hypoxanthine to xanthine. Catalyzes the oxidation of xanthine to uric acid. Contributes to the generation of reactive oxygen species. Has also low oxidase activity towards aldehydes (in vitro).</p> <p>Catalytic Activity</p> <p>H<sub>2</sub>O + NAD<sup>+</sup> + xanthine = H<sup>+</sup> + NADH + urate</p>                                                                                                               | <p>the oxidation of hypoxanthine to purine and purine to uric acid</p> <ul style="list-style-type: none"><li>• plays a physiological role in milk (e.g. in secretion) equal in importance to its catalytic function as an enzyme</li><li>• synergistic action with ALOXE3, group of oxidized fatty acids which can function as PPAR{gamma} activators</li><li>• required for functional differentiation of mammary epithelial cells</li><li>• XDH activity and/or its expression level to contribute to macrophage foam cell formation</li><li>• activity creates both oxidant and anti-oxidant products that are implicated in the development of hypertension, smoking vascular injury, dyslipidemia and diabetes, which are the main risk factors of atherosclerosis</li><li>• is abundant in wounds and participates in normal wound healing through effects on ROS production</li><li>• catalyzes the formation of uric acid (UA) from hypoxanthine and xanthine, which in turn are products of purine metabolism starting from ribose-5-phosphate</li><li>• XDH activity may be potentially involved in adiposity and subclinical inflammation in humans</li></ul> |    |    |     |    |    |  |
| LOX<br>(4015)<br>5q23.1 | lysyl oxidase | <p>Responsible for the post-translational oxidative deamination of peptidyl lysine residues in precursors to fibrous collagen and elastin. Regulator of Ras expression. May play a role in tumor suppression. Plays a role in the aortic wall architecture.</p> <p>Catalytic Activity</p> <p>H<sub>2</sub>O + L-lysyl-[protein] + O<sub>2</sub> = (S)-2-amino-6-oxohexanoyl-[protein] + H<sub>2</sub>O<sub>2</sub> + NH<sub>4</sub><sup>+</sup></p> | <ul style="list-style-type: none"><li>• lysyl oxidase, copper dependent, processed by BMP1 to the mature enzyme necessary for the formation of covalent cross-links in collagen and elastic fibers</li><li>• playing a potential tumor suppressor role but also involved in tumor progression</li><li>• essential for hypoxia-induced metastasis and is a good therapeutic target for preventing and treating metastases</li><li>• key enzyme in extracellular matrix maturation</li></ul>                                                                                                                                                                                                                                                                                                                                                                                                                                                                                                                                                                                                                                                                               | ++ | ++ | +++ | ++ | ++ |  |



---

peripheral nervous system, NO displays many properties of a neurotransmitter. Probably has nitrosylase activity and mediates cysteine S-nitrosylation of cytoplasmic target proteins such SRR.

Catalytic Activity

$H^+ + 2 \text{ L-arginine} + 3 \text{ NADPH} + 4 \text{ O}_2 = 4 \text{ H}_2\text{O}_2 + 2 \text{ L-citrulline} + 3 \text{ NADP}^+ + 2 \text{ nitric oxide}$

- has a distinct local role in the physiological regulation of microvascular tone
  - negatively regulates adult neurogenesis
  - neural stem cells (NSCs)-derived NOS1 stimulates neurogenesis via activating telomerase
  - potential anti-inflammatory role of endothelial NOS1 that can attenuate unopposed, proinflammatory cytokine actions
  - NOS1 in the collecting duct (CD) is critical in the regulation of fluid-electrolyte balance
  - its independent and local regulation of NO levels is crucial for normal cilia function
  - plays a critical role in regulating cardiomyocyte function
  - fundamental role for NOS1-derived NO in regulating TLR4-mediated inflammatory gene transcription, as well as the intensity and duration of the resulting host immune response
  - neuronal NOS1 and endothelial NOS3 are constitutive calcium-dependent forms of the enzyme that regulate neural and vascular function respectively
  - NOS1 may be significant in the pathophysiology of human ischemic heart disease with a preservative role in maintaining myocardial homeostasis
  - NOS1 plays a critical role in neuronal differentiation of hippocampal neural progenitor cells (NPCs)
  - plays an important role in neurite outgrowth and may thus influence brain development, specifically white matter (WM) microstructure
  - mediates insulin- and oxidative stress-induced glucose uptake in skeletal muscle myotubes
  - is a key arginine metabolising enzyme in the brain, and NOS1-derived nitric oxide (NO)
-

|                           |                            |                                                                                                                                                                                                                                                                                                                                                                                                                                                                                                                                                                                                                                                                                                                                                                                                                                                                                                                    |                                                                                                                                                                                                                                                                                                                                                                                                                                                                                                                                                                                                                                                                                                                                                                                                                                                                                                                                                                                                                                                                                                                                                                                                                                                                                                                                                                                                                            |    |    |    |    |    |  |
|---------------------------|----------------------------|--------------------------------------------------------------------------------------------------------------------------------------------------------------------------------------------------------------------------------------------------------------------------------------------------------------------------------------------------------------------------------------------------------------------------------------------------------------------------------------------------------------------------------------------------------------------------------------------------------------------------------------------------------------------------------------------------------------------------------------------------------------------------------------------------------------------------------------------------------------------------------------------------------------------|----------------------------------------------------------------------------------------------------------------------------------------------------------------------------------------------------------------------------------------------------------------------------------------------------------------------------------------------------------------------------------------------------------------------------------------------------------------------------------------------------------------------------------------------------------------------------------------------------------------------------------------------------------------------------------------------------------------------------------------------------------------------------------------------------------------------------------------------------------------------------------------------------------------------------------------------------------------------------------------------------------------------------------------------------------------------------------------------------------------------------------------------------------------------------------------------------------------------------------------------------------------------------------------------------------------------------------------------------------------------------------------------------------------------------|----|----|----|----|----|--|
|                           |                            |                                                                                                                                                                                                                                                                                                                                                                                                                                                                                                                                                                                                                                                                                                                                                                                                                                                                                                                    | plays an important role in regulating glutamatergic neurotransmission                                                                                                                                                                                                                                                                                                                                                                                                                                                                                                                                                                                                                                                                                                                                                                                                                                                                                                                                                                                                                                                                                                                                                                                                                                                                                                                                                      |    |    |    |    |    |  |
| NOS2<br>(4843)<br>17q11.2 | nitric oxide<br>synthase 2 | <p>Produces nitric oxide (NO) which is a messenger molecule with diverse functions throughout the body.</p> <p>In macrophages, NO mediates tumoricidal and bactericidal actions. Also has nitrosylase activity and mediates cysteine S-nitrosylation of cytoplasmic target proteins such PTGS2/COX2.</p> <p>As component of the iNOS-S100A8/9 transnitrosylase complex involved in the selective inflammatory stimulus-dependent S-nitrosylation of GAPDH on 'Cys-247' implicated in regulation of the GAIT complex activity and probably multiple targets including ANXA5, EZR, MSN and VIM.</p> <p>Involved in inflammation, enhances the synthesis of pro-inflammatory mediators such as IL6 and IL8.</p> <p>Catalytic Activity</p> <p>H+ + 2 L-arginine + 3 NADPH + 4 O<sub>2</sub> = 4 H<sub>2</sub>O + 2 L-citrulline + 3 NADP+ + 2 nitric oxide</p> <p>This reaction proceeds in the forward direction.</p> | <ul style="list-style-type: none"><li>• producing nitric oxide synthesis from arginine and molecular oxygen</li><li>• playing a role in neurogenesis</li><li>• role for IDO1 in the regulation of blood pressure, although the contribution of IDO1 to sepsis-induced hypotension is smaller than that of NOS2 (Hofmann 2010)</li><li>• role of NOS2 as a critical host factor regulating apoptosis during respiratory syncytial virus (RSV) infection</li><li>• immune-activated glial cells produced NOS2</li><li>• its expression is restricted to neurons in the healthy brain but is triggered in microglia upon inflammation</li><li>• is an important mediator in high-cholesterol diet (HCD)-induced liver fibrosis</li><li>• NOS2 is calcium-independent and is inducible</li><li>• is a major signaling molecule involved in innate immunity</li><li>• is a novel negative regulator of hematopoietic cell migration and prevents egress of hematopoietic stem/progenitor cells (HSPCs) into peripheral blood (PB) during mobilization</li><li>• crucial role of endogenous NOS2 in promoting optimal IL2 production, proliferation and glycolysis of gamma-delta T cells that may contribute to their regulation at steady state</li><li>• is necessary for the microbicidal activity of macrophages</li><li>• regulates a number of cellular processes in these cell types without exerting toxicity</li></ul> | ++ | ++ | ++ | ++ | ++ |  |
| NOS3<br>(4846)<br>7q36.1  | nitric oxide<br>synthase 3 | <p>Produces nitric oxide (NO) which is implicated in vascular smooth muscle relaxation through a cGMP-mediated signal transduction pathway.</p> <p>NO mediates vascular endothelial growth</p>                                                                                                                                                                                                                                                                                                                                                                                                                                                                                                                                                                                                                                                                                                                     | <ul style="list-style-type: none"><li>• catalyzing the synthesis of NO from l-arginine</li><li>• plays an important role in adiponectin synthesis in adipocytes by increasing mitochondrial biogenesis and enhancing mitochondrial function</li></ul>                                                                                                                                                                                                                                                                                                                                                                                                                                                                                                                                                                                                                                                                                                                                                                                                                                                                                                                                                                                                                                                                                                                                                                      | ++ | ++ | ++ | ++ | ++ |  |



|                                   |                            |                                                                                                                                                                                                                                                                                                                                                                                                                                                                                                                                                                                                                                                                                                                                                              |                                                                                                                                                                                                                                                                                                                                                                                                                                                                                                                                                                                                              |     |    |     |     |    |  |
|-----------------------------------|----------------------------|--------------------------------------------------------------------------------------------------------------------------------------------------------------------------------------------------------------------------------------------------------------------------------------------------------------------------------------------------------------------------------------------------------------------------------------------------------------------------------------------------------------------------------------------------------------------------------------------------------------------------------------------------------------------------------------------------------------------------------------------------------------|--------------------------------------------------------------------------------------------------------------------------------------------------------------------------------------------------------------------------------------------------------------------------------------------------------------------------------------------------------------------------------------------------------------------------------------------------------------------------------------------------------------------------------------------------------------------------------------------------------------|-----|----|-----|-----|----|--|
|                                   |                            | D-tryptophan + O <sub>2</sub> = N-formyl-D-kynurenine                                                                                                                                                                                                                                                                                                                                                                                                                                                                                                                                                                                                                                                                                                        | <ul style="list-style-type: none"> <li>metabolizing tryptophan to N-formyl-kynurenine under certain pathophysiological conditions</li> <li>might be involved in chronic inflammatory diseases, such as atherosclerosis, morbid obesity and chronic heart disease</li> <li>role for IDO1 in the regulation of blood pressure, although the contribution of IDO1 to sepsis-induced hypotension is smaller than that of NOS2</li> <li>contributes to arterial vessel relaxation and the control of blood pressure</li> <li>having role in retinal pigment epithelial cell-mediated immune modulation</li> </ul> |     |    |     |     |    |  |
| <i>TDO2</i><br>(6999)<br>4q31-q32 | tryptophan 2,3-dioxygenase | <p>Heme-dependent dioxygenase that catalyzes the oxidative cleavage of the L-tryptophan (L-Trp) pyrrole ring and converts L-tryptophan to N-formyl-L-kynurenine. Catalyzes the oxidative cleavage of the indole moiety.</p> <p>Catalytic Activity<br/>L-tryptophan + O<sub>2</sub> = N-formyl-L-kynurenine</p>                                                                                                                                                                                                                                                                                                                                                                                                                                               | <ul style="list-style-type: none"> <li>catalyzing the oxidation of L-tryptophan to formylkynurenine and controlling the physiological flux of tryptophan into both the serotonergic and kynureninic pathways</li> </ul>                                                                                                                                                                                                                                                                                                                                                                                      | ++  | ++ | +   | +++ | ++ |  |
| <i>AOX1</i><br>(316)<br>2q33      | aldehyde oxidase 1         | <p>Oxidase with broad substrate specificity, oxidizing aromatic azaheterocycles, such as N1-methylnicotinamide, N-methylphthalazinium and phthalazine, as well as aldehydes, such as benzaldehyde, retinal, pyridoxal, and vanillin. Plays a key role in the metabolism of xenobiotics and drugs containing aromatic azaheterocyclic substituents. Participates in the bioactivation of prodrugs such as famciclovir, catalyzing the oxidation step from 6-deoxypenciclovir to penciclovir, which is a potent antiviral agent. Is probably involved in the regulation of reactive oxygen species homeostasis. May be a prominent source of superoxide generation via the one-electron reduction of molecular oxygen. May also catalyze nitric oxide (NO)</p> | <ul style="list-style-type: none"> <li>can catalyze the formation of superoxide</li> </ul>                                                                                                                                                                                                                                                                                                                                                                                                                                                                                                                   | +++ | ++ | +++ | +++ | +  |  |

|                                   |                                        |                                                                                                                                                                                                                                                                                                                                                                                                                                                                                                                                                                                                                                                                                                                                                                                                                                                                                                                                                                                                                                                                                                                                                                                                                                                                                                                                                                                                                                                                                                 |                                                                                                                                                                                                                                                                                                                                                                                                                                                                                                                                                                                                                                                       |    |    |   |    |     |  |  |
|-----------------------------------|----------------------------------------|-------------------------------------------------------------------------------------------------------------------------------------------------------------------------------------------------------------------------------------------------------------------------------------------------------------------------------------------------------------------------------------------------------------------------------------------------------------------------------------------------------------------------------------------------------------------------------------------------------------------------------------------------------------------------------------------------------------------------------------------------------------------------------------------------------------------------------------------------------------------------------------------------------------------------------------------------------------------------------------------------------------------------------------------------------------------------------------------------------------------------------------------------------------------------------------------------------------------------------------------------------------------------------------------------------------------------------------------------------------------------------------------------------------------------------------------------------------------------------------------------|-------------------------------------------------------------------------------------------------------------------------------------------------------------------------------------------------------------------------------------------------------------------------------------------------------------------------------------------------------------------------------------------------------------------------------------------------------------------------------------------------------------------------------------------------------------------------------------------------------------------------------------------------------|----|----|---|----|-----|--|--|
|                                   |                                        | production via the reduction of nitrite to NO with NADH or aldehyde as electron donor. May play a role in adipogenesis.                                                                                                                                                                                                                                                                                                                                                                                                                                                                                                                                                                                                                                                                                                                                                                                                                                                                                                                                                                                                                                                                                                                                                                                                                                                                                                                                                                         |                                                                                                                                                                                                                                                                                                                                                                                                                                                                                                                                                                                                                                                       |    |    |   |    |     |  |  |
| <i>ALOX12</i><br>(239)<br>17p13.1 | arachidonate 12-lipoxygenase, 12S type | <p>Catalyzes the regio and stereo-specific incorporation of molecular oxygen into free and esterified polyunsaturated fatty acids generating lipid hydroperoxides that can be further reduced to the corresponding hydroxy species.</p> <p>Mainly converts arachidonate ((5Z,8Z,11Z,14Z)-eicosatetraenoate) to the specific bioactive lipid (12S)-hydroperoxyeicosatetraenoate/(12S)-HPETE.</p> <p>Through the production of bioactive lipids like (12S)-HPETE it regulates different biological processes including platelet activation. It can also catalyze the epoxidation of double bonds of polyunsaturated fatty acids such as (14S)-hydroperoxy-docosahexaenoate/(14S)-HPDHA resulting in the formation of (13S,14S)-epoxy-DHA. Furthermore, it may participate in the sequential oxidations of DHA ((4Z,7Z,10Z,13Z,16Z,19Z)-docosahexaenoate) to generate specialized pro-resolving mediators (SPMs) like resolvin D5 ((7S,17S)-diHPDHA) and (7S,14S)-diHPDHA, that actively down-regulate the immune response and have anti-aggregation properties with platelets (PubMed:32404334).</p> <p>An additional function involves a multistep process by which it transforms leukotriene A4/LTA4 into the bioactive lipids lipoxin A4/LXA4 and lipoxin B4/LXB4, both are vasoactive and LXA4 may regulate neutrophil function via occupancy of specific recognition sites. Can also peroxidize linoleate ((9Z,12Z)-octadecadienoate) to (13S)-hydroperoxyoctadecadienoate/ (13S-HPODE).</p> | <ul style="list-style-type: none"><li>• catalyzing the first step of leukotrienes biosynthesis from arachidonate</li><li>• lipid peroxidating enzyme implicated in the pathogenesis of inflammatory disorders as well as membrane remodeling</li><li>• carcinogenesis and atheroma formation</li><li>• cardiac ALOX12/ALOX15 is involved in the development of heart failure</li><li>• ALOX12/ALOX15 mediates early stages of adipose tissue inflammation and whole body insulin resistance induced by high fat feeding</li><li>• ALOX12/ALOX15 is required for the maintenance of long-term hematopoietic stem cells quiescence and number</li></ul> | ++ | ++ | + | ++ | +++ |  |  |

|                          |                        |                                                                                                                                                                                                                                                                                                                                                                                                                                                                                                                                                                                                                                                      |                                                                                                                                                                                                                                                                                                                                                                                                                                                                                                                                                                                                                                                                                                                                                                                                                                                                                                                                                                                                                                                                                                                         |     |    |     |    |    |  |
|--------------------------|------------------------|------------------------------------------------------------------------------------------------------------------------------------------------------------------------------------------------------------------------------------------------------------------------------------------------------------------------------------------------------------------------------------------------------------------------------------------------------------------------------------------------------------------------------------------------------------------------------------------------------------------------------------------------------|-------------------------------------------------------------------------------------------------------------------------------------------------------------------------------------------------------------------------------------------------------------------------------------------------------------------------------------------------------------------------------------------------------------------------------------------------------------------------------------------------------------------------------------------------------------------------------------------------------------------------------------------------------------------------------------------------------------------------------------------------------------------------------------------------------------------------------------------------------------------------------------------------------------------------------------------------------------------------------------------------------------------------------------------------------------------------------------------------------------------------|-----|----|-----|----|----|--|
|                          |                        | Due to its role in regulating both the expression of the vascular endothelial growth factor (VEGF, an angiogenic factor involved in the survival and metastasis of solid tumors) and the expression of integrin beta-1 (known to affect tumor cell migration and proliferation), it can be regarded as protumorigenic. Important for cell survival, as it may play a role not only in proliferation but also in the prevention of apoptosis in vascular smooth muscle cells.                                                                                                                                                                         |                                                                                                                                                                                                                                                                                                                                                                                                                                                                                                                                                                                                                                                                                                                                                                                                                                                                                                                                                                                                                                                                                                                         |     |    |     |    |    |  |
| MAOA<br>(4128)<br>Xp11.3 | monoamine oxidase<br>A | Catalyzes the oxidative deamination of primary and some secondary amine such as neurotransmitters, with concomitant reduction of oxygen to hydrogen peroxide and has important functions in the metabolism of neuroactive and vasoactive amines in the central nervous system and peripheral tissues. Preferentially oxidizes serotonin.<br>Also catalyzes the oxidative deamination of kynuramine to 3-(2-aminophenyl)-3-oxopropanal that can spontaneously condense to 4-hydroxyquinoline<br>Catalytic Activity<br>a secondary aliphatic amine + H <sub>2</sub> O + O <sub>2</sub> = a primary amine + an aldehyde + H <sub>2</sub> O <sub>2</sub> | <ul style="list-style-type: none"><li>degrading amine neurotransmitters (such as dopamine, norepinephrin and serotonin)</li><li>having important functions in the metabolism of neuroactive and vasoactive amines in the central nervous system and peripheral tissues</li><li>MAOA, SLC6A2, SLC6A3 may play important roles in regulating maternal monoamine neurotransmitters transferred across the placenta to the fetus</li><li>novel roles for MAOA, MAOB and serotonin in the regulation of intermediate progenitor cells proliferation in the developing brain</li><li>MAOA and MAOB are a crucial pair of isoenzymes, which oxidatively deaminate monoamine neurotransmitters and dietary amines with a production of hydrogen peroxide</li><li>MAOA, and MAOB are dimeric in their membrane-bound forms</li><li>MAOA and MAOB are mitochondrial-bound proteins, catalyzing the oxidative deamination of monoamine neurotransmitters as well as xenobiotic amines</li><li>primarily deaminates serotonin, norepinephrine, and dopamine and, therefore, is implicated in several psychiatric diseases</li></ul> | +++ | ++ | +++ | ++ | +  |  |
| MAOB                     | monoamine oxidase      | Catalyzes the oxidative deamination of                                                                                                                                                                                                                                                                                                                                                                                                                                                                                                                                                                                                               | <ul style="list-style-type: none"><li>degrading amine neurotransmitters</li></ul>                                                                                                                                                                                                                                                                                                                                                                                                                                                                                                                                                                                                                                                                                                                                                                                                                                                                                                                                                                                                                                       | ++  | ++ | +   | ++ | ++ |  |



|                   |   |                                                                                                                                                                                                                                                                                                                                                                                                                                                                                                                                                                                                     |                                                                                                                                                                                                                                                                                                                                                                                                                                                                                                                                                                                                                                                                                                                                                                                                                                                                                                                                                                                                                                                                                                     |
|-------------------|---|-----------------------------------------------------------------------------------------------------------------------------------------------------------------------------------------------------------------------------------------------------------------------------------------------------------------------------------------------------------------------------------------------------------------------------------------------------------------------------------------------------------------------------------------------------------------------------------------------------|-----------------------------------------------------------------------------------------------------------------------------------------------------------------------------------------------------------------------------------------------------------------------------------------------------------------------------------------------------------------------------------------------------------------------------------------------------------------------------------------------------------------------------------------------------------------------------------------------------------------------------------------------------------------------------------------------------------------------------------------------------------------------------------------------------------------------------------------------------------------------------------------------------------------------------------------------------------------------------------------------------------------------------------------------------------------------------------------------------|
| (4129)<br>Xp11.23 | B | <p>primary and some secondary amines such as neurotransmitters, and exogenous amines including the tertiary amine, neurotoxin 1-methyl-4-phenyl-1,2,3,6-tetrahydropyridine (MPTP), with concomitant reduction of oxygen to hydrogen peroxide and participates in the metabolism of neuroactive and vasoactive amines in the central nervous system and peripheral tissues. Preferentially degrades benzylamine and phenylethylamine.</p> <p>Catalytic Activity</p> <p>a secondary aliphatic amine + H<sub>2</sub>O + O<sub>2</sub> = a primary amine + an aldehyde + H<sub>2</sub>O<sub>2</sub></p> | <ul style="list-style-type: none"> <li>• catalyzing the oxidative deamination of biogenic and xenobiotic amines and playing an important role in the metabolism of neuroactive and vasoactive amines in the central nervous system and peripheral tissues</li> <li>• novel roles for MAOA, MAOB and serotonin in the regulation of intermediate progenitor cells proliferation in the developing brain</li> <li>• PARK2 suppresses the transcription of MAOA, MAOB to control oxidative stress induced by dopamine oxidation</li> <li>• MAOA and MAOB are a crucial pair of isoenzymes, which oxidatively deaminate monoamine neurotransmitters and dietary amines with a production of hydrogen peroxide</li> <li>• MAOA, and MAOB are dimeric in their membrane-bound forms</li> <li>• MAOA and MAOB are mitochondrial-bound proteins, catalyzing the oxidative deamination of monoamine neurotransmitters as well as xenobiotic amines</li> <li>• plays an important role in the metabolism of neuroactive and vasoactive amines in the central nervous system and peripheral tissues</li> </ul> |
|-------------------|---|-----------------------------------------------------------------------------------------------------------------------------------------------------------------------------------------------------------------------------------------------------------------------------------------------------------------------------------------------------------------------------------------------------------------------------------------------------------------------------------------------------------------------------------------------------------------------------------------------------|-----------------------------------------------------------------------------------------------------------------------------------------------------------------------------------------------------------------------------------------------------------------------------------------------------------------------------------------------------------------------------------------------------------------------------------------------------------------------------------------------------------------------------------------------------------------------------------------------------------------------------------------------------------------------------------------------------------------------------------------------------------------------------------------------------------------------------------------------------------------------------------------------------------------------------------------------------------------------------------------------------------------------------------------------------------------------------------------------------|

---

<sup>1</sup> Human Gene Nomenclature Committee (<https://www.genenames.org>); <sup>2</sup> Entrez Gene (<https://www.ncbi.nlm.nih.gov/gene>); <sup>3</sup> UniProt (<https://www.uniprot.org>); <sup>4</sup> GENATLAS (<http://genatlas.medecine.univ-paris5.fr/>); <sup>5</sup> BioGPS (<http://biogps.org>). The number of the "+" symbols means the level of gene expression in the tissues/organs playing a role in the pathogenesis of type 2 diabetes: low (+), medium (++) and high (+++). "-" depicts that the gene expression is too low or not detected (<0.5 Me).  
Low expression: >0.5 Me, <1 Me; medium expression: >1 Me, <10 Me; high expression: >10 Me.

---
